1 **Clinical Characteristics, Racial Inequities, and Outcomes in Patients with Breast Cancer and COVID-19: A COVID-**  
2 **19 and Cancer Consortium (CCC19) Cohort Study**

3  
4 **BRIEF TITLE: COVID-19 and Breast Cancer**

5 **AUTHORS:** Gayathri Nagaraj, MD<sup>1\*#</sup>; Shaveta Vinayak, MD, MS<sup>2,3,4\*</sup>; Ali Raza Khaki, MD<sup>5\*</sup>; Tianyi Sun, MS<sup>6</sup>; Nicole M.  
6 Kuderer, MD<sup>3,7</sup>; David M. Aboulaflia, MD<sup>8</sup>; Jared D. Acoba, MD<sup>9</sup>; Joy Awosika, MD<sup>10</sup>; Ziad Bakouny, MD, MSc<sup>11</sup>; Nicole  
7 B. Balmaceda, MD<sup>12</sup>; Ting Bao, MD, DABMA, MS<sup>13</sup>; Babar Bashir, MD, MS<sup>14</sup>; Stephanie Berg, DO<sup>15</sup>; Mehmet A. Bilen,  
8 MD<sup>16</sup>; Poorva Bindal, MD<sup>17</sup>; Sibel Blau, MD<sup>18</sup>; Brianne E. Bodin, BS<sup>19</sup>; Hala T. Borno, MD<sup>20</sup>; Cecilia Castellano, BA<sup>16</sup>;  
9 Horyun Choi, MD<sup>9</sup>; John Deeken, MD<sup>21</sup>; Aakash Desai, MD, MPH<sup>22</sup>; Natasha Edwin, MD<sup>23</sup>; Lawrence E. Feldman, MD<sup>24</sup>;  
10 Daniel B. Flora, MD, PharmD<sup>25</sup>; Christopher R. Friese, PhD, RN<sup>26</sup>; Matthew D. Galsky, MD<sup>27</sup>; Cyndi J. Gonzalez, BS<sup>26</sup>;  
11 Petros Grivas, MD, PhD<sup>2,3,4</sup>; Shilpa Gupta, MD<sup>28</sup>; Marcy Haynam, MS<sup>29</sup>; Hannah Heilman, BS<sup>10</sup>; Dawn L. Hershman, MD,  
12 MS<sup>19</sup>; Clara Hwang, MD<sup>30</sup>; Chinmay Jani, MD<sup>31</sup>; Sachin R. Jhawar, MD<sup>29</sup>; Monika Joshi, MD<sup>32</sup>; Virginia Kaklamani, MD,  
13 DSc<sup>33</sup>; Elizabeth J. Klein, BA<sup>34</sup>; Natalie Knox, BS<sup>35</sup>; Vadim S. Koshkin, MD<sup>20</sup>; Amit A. Kulkarni, MD<sup>36</sup>; Daniel H. Kwon,  
14 MD<sup>20</sup>; Chris Labaki, MD<sup>11</sup>; Philip E. Lammers, MD, MSCI<sup>37</sup>; Kate I. Lathrop, MD<sup>33</sup>; Mark A. Lewis, MD<sup>38</sup>; Xuanyi Li,  
15 MD<sup>6</sup>; Gilberto de Lima Lopes, MD, MBA<sup>39</sup>; Gary H. Lyman, MD, MPH<sup>2,3,4</sup>; Della F. Makower, MD<sup>40</sup>; Abdul-Hai Mansoor,  
16 MD<sup>41</sup>; Merry-Jennifer Markham, MD<sup>42</sup>; Sandeep H. Mashru, MD<sup>41</sup>; Rana R. McKay, MD<sup>43</sup>; Ian Messing, MST<sup>44</sup>; Vasil  
17 Mico, BS<sup>14</sup>; Rajani Nadkarni, MD<sup>45</sup>; Swathi Namburi, MD<sup>18</sup>; Ryan H. Nguyen, DO<sup>24</sup>; Taylor Kristian Nonato, BS<sup>43</sup>; Tracey  
18 Lynn O'Connor, MD<sup>46</sup>; Orestis A. Panagiotou, MD, PhD<sup>34</sup>; Kyu Park, BA<sup>1</sup>; Jaymin M. Patel, MD<sup>17</sup>; Kanishka GopikaBimal  
19 Patel, MD<sup>47</sup>; Jeffrey Peppercorn, MD<sup>48</sup>; Hyma Polimera, MD<sup>32</sup>; Matthew Puc, MD<sup>49</sup>; Yuan James Rao, MD<sup>44</sup>; Pedram  
20 Razavi, BS<sup>43</sup>; Sonya A. Reid, MBBS; MPH<sup>6</sup>; Jonathan W. Riess, MD, MS<sup>47</sup>; Donna R. Rivera, DPharm, MSc<sup>50</sup>; Mark  
21 Robson, MD<sup>13</sup>; Suzanne J. Rose, MS, PhD<sup>51</sup>; Atlantis D. Russ, MD, PhD<sup>42</sup>; Lidia Schapira, MD<sup>5</sup>; Pankil K. Shah, MD,  
22 MSPH<sup>33</sup>; M. Kelly Shanahan, MD<sup>52</sup>; Lauren C. Shapiro, MD<sup>40</sup>; Melissa Smits, APNP<sup>23</sup>; Daniel G. Stover, MD<sup>29</sup>; Mitrianna  
23 Streckfuss, MPH, CCRP<sup>53</sup>; Lisa Tachiki, MD<sup>2,3,4</sup>; Michael A. Thompson, MD, PhD<sup>53</sup>; Sara M. Tolaney, MD, MPH<sup>11</sup>; Lisa B.  
24 Weissmann, MD<sup>31</sup>; Grace Wilson, BA<sup>36</sup>; Michael T. Wotman, MD<sup>27</sup>; Elizabeth M. Wulff-Burchfield, MD<sup>12</sup>; Sanjay Mishra,  
25 MS, PhD<sup>6</sup>; Benjamin French, PhD<sup>6</sup>; Jeremy L. Warner, MD, MS<sup>6</sup>; Maryam B. Lustberg, MD, MPH<sup>54\*\*</sup>; Melissa K.  
26 Accordino, MD, MS<sup>19\*\*</sup>; Dimpy P. Shah, MD, PhD<sup>33\*\*</sup> on behalf of the COVID-19 and Cancer Consortium.

27

Formatted: Numbering: Continuous

28 **AFFILIATIONS:**

29 <sup>1</sup>Loma Linda University Cancer Center, Loma Linda, CA

30 <sup>2</sup>Fred Hutchinson Cancer Research Center, Seattle, WA

31 <sup>3</sup>University of Washington, Seattle, WA

32 <sup>4</sup>Seattle Cancer Care Alliance, Seattle, WA

33 <sup>5</sup>Stanford University, Palo Alto, CA

34 <sup>6</sup>Vanderbilt University Medical Center, Nashville, TN

35 <sup>7</sup>Advanced Cancer Research Group, Kirkland, WA

36 <sup>8</sup>Virginia Mason Cancer Institute, Seattle, WA

37 <sup>9</sup>University of Hawaii Cancer Center, Honolulu, HI

38 <sup>10</sup>University of Cincinnati Cancer Center, Cincinnati, OH

39 <sup>11</sup>Dana-Farber Cancer Institute, Boston, MA

40 <sup>12</sup>The University of Kansas Cancer Center, Kansas City, KS

41 <sup>13</sup>Memorial Sloan-Kettering Cancer Center, New York, NY

42 <sup>14</sup>Sidney Kimmel Cancer Center at Thomas Jefferson University, Philadelphia, PA

43 <sup>15</sup>Loyola University Medical Center, Maywood, IL

44 <sup>16</sup>Winship Cancer Institute of Emory University, Atlanta, GA

45 <sup>17</sup>Beth Israel Deaconess Medical Center, Boston, MA

46 <sup>18</sup>Northwest Medical Specialties, Tacoma, WA

47 <sup>19</sup>Herbert Irving Comprehensive Cancer Center at Columbia University, New York, NY

48 <sup>20</sup>UCSF Helen Diller Family Comprehensive Cancer Center at the University of California at San Francisco, San Francisco,

49 CA

50 <sup>21</sup>Inova Schar Cancer Institute, Fairfax, VA

51 <sup>22</sup>Mayo Clinic, MN

52 <sup>23</sup>ThedaCare Cancer Care, Appleton, WI

53 <sup>24</sup>University of Illinois Hospital & Health Sciences System, Chicago, IL

54 <sup>25</sup>St. Elizabeth Healthcare, Edgewood, KY

55 <sup>26</sup>University of Michigan Rogel Cancer Center, Ann Arbor, MI

- 56 <sup>27</sup>Tisch Cancer Institute at the Icahn School of Medicine at Mount Sinai, New York, NY
- 57 <sup>28</sup>Cleveland Clinic, Cleveland, OH
- 58 <sup>29</sup>The Ohio State University Comprehensive Cancer Center, Columbus, OH
- 59 <sup>30</sup>Henry Ford Cancer Institute, Henry Ford Hospital, Detroit, MI
- 60 <sup>31</sup>Mount Auburn Hospital, Cambridge, MA
- 61 <sup>32</sup>Penn State Health St. Joseph Cancer Center, PA
- 62 <sup>33</sup>Mays Cancer Center at UT Health San Antonio MD Anderson Cancer Center, San Antonio, TX
- 63 <sup>34</sup>Brown University and Lifespan Cancer Institute, Providence, RI
- 64 <sup>35</sup>Stritch School of Medicine at Loyola University, Maywood, IL
- 65 <sup>36</sup>Masonic Cancer Center at the University of Minnesota, Minneapolis, MN
- 66 <sup>37</sup>Baptist Cancer Center, Memphis, TN
- 67 <sup>38</sup>Intermountain Health Care, Salt Lake City, UT
- 68 <sup>39</sup>Sylvester Comprehensive Cancer Center at the University of Miami Miller School of Medicine, Miami, FL
- 69 <sup>40</sup>Albert Einstein College of Medicine, Montefiore Medical Center, Bronx, NY
- 70 <sup>41</sup>Kaiser Permanente Northwest, OR/WA
- 71 <sup>42</sup>University of Florida, Division of Hematology and Oncology, UF Health Cancer Center, Gainesville, FL
- 72 <sup>43</sup>Moore's Cancer Center, University of California, San Diego, CA
- 73 <sup>44</sup>Division of Radiation Oncology, George Washington University, Washington, DC
- 74 <sup>45</sup>Hartford HealthCare Cancer Institute, Hartford, CT
- 75 <sup>46</sup>Roswell Park Comprehensive Cancer Center, Buffalo, NY
- 76 <sup>47</sup>UC Davis Comprehensive Cancer Center at the University of California at Davis, CA
- 77 <sup>48</sup>Massachusetts General Hospital, Boston, MA
- 78 <sup>49</sup>Virtua Health, Marlton, NJ
- 79 <sup>50</sup>Division of Cancer Control and Population Sciences, National Cancer Institute, Rockville, USA
- 80 <sup>51</sup>Carl & Dorothy Bennett Cancer Center at Stamford Hospital, Stamford, CT
- 81 <sup>52</sup>METAvisor
- 82 <sup>53</sup>Aurora Cancer Care, Advocate Aurora Health, Milwaukee, WI
- 83 <sup>54</sup>Yale Cancer Center at Yale University School of Medicine, New Haven, CT

84 \*Co-Primary authors

85 \*\*Co-Senior authors

86

87 **CORRESPONDING AUTHORS:**

88 Gayathri Nagaraj MD, Division of Medical Oncology and Hematology, Loma Linda University School of Medicine, 11175

89 Campus Street, CSP 11015, Loma Linda, CA 92354. Ph: 909-558-4910; Email: gnagaraj@llu.edu

90 Dimpy P. Shah, MD, PhD, Population Health Sciences, Mays Cancer Center at UTHealth San Antonio MD Anderson, 7703

91 Floyd Curl Drive, San Antonio, TX, 78229, Ph: 210-562-6503; Email: ShahDP@uthscsa.edu

92

93 **KEYWORDS:** Breast cancer, SARS-CoV-2, COVID-19, Risk Factors, Racial Inequities, Oncology, Pandemic,

94

95 **WORD COUNT:** 3477

96

97

98

99

100

101

102

103

104

105

106 **ABSTRACT**

107 **Background:** Limited information is available for patients with breast cancer (BC) and coronavirus disease 2019 (COVID-  
108 19), especially among underrepresented racial/ethnic populations.

109 **Methods:** This is a COVID-19 and Cancer Consortium (CCC19) registry-based retrospective cohort study of females with  
110 active or history of BC and laboratory-confirmed severe acute respiratory syndrome coronavirus-2 (SARS-CoV-2) infection  
111 diagnosed between March 2020 and June 2021 in the US. Primary outcome was COVID-19 severity measured on a five-level  
112 ordinal scale, including none of the following complications, hospitalization, intensive care unit admission, mechanical  
113 ventilation, and all-cause mortality. Multivariable ordinal logistic regression model identified characteristics associated with  
114 COVID-19 severity.

115 **Results:** 1,383 female patient records with BC and COVID-19 were included in the analysis, the median age was 61 years,  
116 and median follow-up was 90 days. Multivariable analysis revealed higher odds of COVID-19 severity for older age (aOR  
117 per decade, 1.48 [95% CI, 1.32 – 1.67]); Black patients (aOR 1.74; 95 CI 1.24-2.45), Asian Americans and Pacific Islander  
118 patients (aOR 3.40; 95 CI 1.70 – 6.79) and Other (aOR 2.97; 95 CI 1.71-5.17) racial/ethnic groups; worse ECOG  
119 performance status (ECOG PS  $\geq$ 2: aOR, 7.78 [95% CI, 4.83 – 12.5]); pre-existing cardiovascular (aOR, 2.26 [95% CI, 1.63 –  
120 3.15])/pulmonary comorbidities (aOR, 1.65 [95% CI, 1.20 – 2.29]); diabetes mellitus (aOR, 2.25 [95% CI, 1.66 – 3.04]); and  
121 active and progressing cancer (aOR, 12.5 [95% CI, 6.89 – 22.6]). Hispanic ethnicity, timing and type of anti-cancer therapy  
122 modalities were not significantly associated with worse COVID-19 outcomes. The total all-cause mortality and  
123 hospitalization rate for the entire cohort was 9% and 37%, respectively however, it varied according to the BC disease status.

124 **Conclusions:** Using one of the largest registries on cancer and COVID-19, we identified patient and BC related factors  
125 associated with worse COVID-19 outcomes. After adjusting for baseline characteristics, underrepresented racial/ethnic  
126 patients experienced worse outcomes compared to Non-Hispanic White patients.

127 **Funding:** This study was partly supported by National Cancer Institute grant number P30 CA068485 to Tianyi Sun, Sanjay  
128 Mishra, Benjamin French, Jeremy L. Warner; P30-CA046592 to Christopher R. Friese; P30 CA023100 for Rana R McKay;  
129 P30-CA054174 for Pankil K. Shah and Dimpy P. Shah; and the American Cancer Society and Hope Foundation for Cancer  
130 Research (MRSG-16-152-01 -CCE) and P30-CA054174 for Dimpy P. Shah. REDCap is developed and supported by

131 Vanderbilt Institute for Clinical and Translational Research grant support (UL1 TR000445 from NCATS/NIH). The funding  
132 sources had no role in the writing of the manuscript or the decision to submit it for publication.

133 **Clinical Trial Number:** CCC19 registry is registered on ClinicalTrials.gov, NCT04354701.

134

135

136 **ABBREVIATIONS:**

137 CCC19: Cancer and COVID-19 Consortium

138 COVID-19: Coronavirus disease 2019

139 BC: Breast Cancer

140 SARS-CoV-2: Severe Acute Respiratory Syndrome Coronavirus-2

141 NHW: Non-Hispanic White

142 AAPI: Asian Americans and Pacific Islanders

143 ECOG PS: Eastern Cooperative Oncology Group performance status

144 HR: Hormone receptor

145 HER2: Human epidermal growth factor receptor 2

146 CDK 4/6 inhibitor: Cyclin-dependent kinase 4/6 inhibitor

147 NED: No evidence of disease

148 MBC: Metastatic breast cancer

149

150

151

152

153

154

155

156

157 **INTRODUCTION**

158 The COVID-19 pandemic has had a devastating impact worldwide and within the United States (U.S.).[1], [2] Previous  
159 studies have reported that patients with cancer are at an increased risk for SARS-CoV-2 infection and have higher rates of  
160 adverse outcomes with mortality rates ranging from 14% to 33%.[3]–[10] COVID-19 has also highlighted the long-standing  
161 health inequities in the U.S, as underrepresented racial and ethnic populations have disproportionately been affected. Some  
162 studies have reported non-White race/ethnicity to be an independent risk factor for worse COVID-19 outcomes such as  
163 hospitalization and death.[3], [6], [11]–[20] Recently published data from CCC19 also showed that Black patients with  
164 cancer experienced worse COVID-19 outcomes compared to White patients after adjusting for key risk factors including  
165 cancer status and comorbidities.[21]

166  
167 Breast cancer (BC) is the most common cancer diagnosed in females and affects all major racial/ethnic groups.[22]–[24]  
168 There are well described racial/ethnic differences in BC incidence and outcomes in females in the U.S attributable to multiple  
169 social and biological factors.[25]–[27] Few studies have specifically evaluated the impact of COVID-19 in patients with BC;  
170 interpretation from prior studies has been limited by small sample sizes.[28], [29] Data specifically on the impact of COVID-  
171 19 among underrepresented racial/ethnic groups with BC are also lacking. Understanding the sociodemographic and clinical  
172 factors associated with higher risk for adverse COVID-19 outcomes will help guide patient care. Hence, we aimed to evaluate  
173 the prognostic factors, racial disparities, interventions, complications, and outcomes among patients with active or previous  
174 history of BC diagnosed with COVID-19.

175

176 **METHODS**

177 **Study population**

178 The COVID-19 and Cancer Consortium (CCC19) consists of 129 member institutions capturing granular, detailed, and  
179 uniform data on demographic and clinical characteristics, treatment information, and outcomes of COVID-19. Details of  
180 CCC19 protocol, data collection, and quality assurance have been previously described.[30], [31] This registry-based  
181 retrospective cohort study included all female adults (age $\geq$ 18 years) with an active or previous history of invasive BC and  
182 laboratory-confirmed diagnosis of SARS-CoV-2 by polymerase chain reaction (PCR) and/or serology from March 17, 2020,  
183 to June 16, 2021 in the United States. Patient records with multiple invasive malignancies including history of multiple



184 invasive BC were excluded; patients with unknown or missing race and ethnicity, inadequate data quality (quality score>4)  
185 and those not evaluable for the primary ordinal outcome were also excluded (*supplementary appendix*).[31] This study was  
186 exempt from institutional review board (IRB) review (VUMC IRB#200467) and was approved by IRBs at participating sites  
187 per institutional policy. CCC19 registry is registered on ClinicalTrials.gov, NCT04354701.

188

### 189 **Outcome definitions**

190 The primary outcome was a five-level ordinal scale of COVID-19 severity based on each individual patient's most severe  
191 reported disease status: none of the following complications (0); admitted to the hospital; admitted to an intensive care unit  
192 (ICU); mechanically ventilated at any time after COVID-19 diagnosis; or death from any cause. Other COVID-19 related  
193 complications (cardiovascular; gastrointestinal; and pulmonary complications, acute kidney injury, multisystem organ failure,  
194 superimposed infection, sepsis, any bleeding); 30-day mortality; and anti-COVID-19 directed interventions (supplemental  
195 oxygen, remdesivir, systemic corticosteroids, hydroxychloroquine, and other treatments) are also reported.

196

### 197 **Covariates**

198 Covariates were selected *a priori* and included: age; sex; race/ethnicity (Non-Hispanic White [NHW], Black, Hispanic, Asian  
199 Americans and Pacific Islanders [AAPI], and Other) as recorded in the EHR, based on the Center for Disease Control and  
200 Prevention Race and Ethnicity codes[32]; U.S census region of reporting institution (Northeast [NE], Midwest [MW], South  
201 and West); month/year of COVID-19 diagnosis (classified into 4-month intervals); smoking status; obesity; comorbidities  
202 (cardiovascular, pulmonary, renal, or diabetes mellitus); Eastern Cooperative Oncology Group (ECOG) performance status  
203 (PS); BC subtypes based on hormone receptor (HR) and human epidermal growth factor receptor 2 (HER2) expression  
204 (HR+/HER2-, HR+/HER2+, HR-/HER2+, HR-/HER2- [triple negative], missing/unknown); cancer status at time of COVID-  
205 19 diagnosis; timing of most recent anti-cancer therapy relative to COVID-19 diagnosis (never or after COVID-19 diagnosis,  
206 0-4 weeks, 1-3 months, >3 months); and modality of anti-cancer therapy received within three months of COVID-19  
207 diagnosis. Cancer status was defined as remission or no evidence of disease (NED) for >5 years, remission or NED for ≤ 5  
208 years, and active disease, with active disease further classified as responding to therapy, stable, or progressing. Anti-cancer  
209 modalities were categorized as chemotherapy; cyclin-dependent kinase (CDK) 4/6 inhibitor; anti-HER2 therapy; other  
210 targeted therapy (non-CDK 4/6 inhibitor, non-anti-HER2 therapy); endocrine therapy; immunotherapy; and locoregional

211 therapy (surgery and/or radiation). In the survey, drug classes (modalities) along with a few specific drugs (through  
212 checkboxes) were captured. Survey respondents were also encouraged to provide additional details in the free text boxes  
213 which were reviewed extensively by the Informatics Core at VUMC, and queries were sent to participating sites to clarify  
214 ambiguous reports. CDK 4/6 inhibitor, anti-HER2 therapy and other targeted therapy information was extracted from free  
215 text in the registry survey while the others were checkboxes. In addition, baseline severity of COVID-19 at presentation,  
216 classified as mild (no hospitalization indicated), moderate (hospitalization indicated), and severe (ICU admission indicated)  
217 was collected. Other variables included location of patient residence (urban, suburban, rural) and treatment center  
218 characteristics (academic medical center, community practice, tertiary care center). The CCC19 data dictionary is available at  
219 [https://github.com/covidncancer/CCC19\\_dictionary](https://github.com/covidncancer/CCC19_dictionary). The project approved variables used for the analysis are provided in  
220 *supplementary appendix*.

221

## 222 ***Statistical methods***

223 Covariates, outcome definitions, and statistical analysis plan were pre-specified by the authors and the CCC19 Research  
224 Coordinating Center prior to analysis (*supplementary appendix*). Standard descriptive statistics were used to summarize  
225 prognostic factors, rates of clinical complications, interventions during hospitalization, and rates of outcomes such as 30-day  
226 mortality, hospitalization, oxygen requirement, ICU admission, mechanical ventilation, and overall mortality among racial  
227 and ethnic groups. The primary analysis was restricted to females with BC.

228

229 Multivariable ordinal logistic regression models for the COVID-19 severity outcome among females with BC included age,  
230 race/ethnicity, obesity, ECOG PS, co-morbidities, cancer status, anti-cancer therapy and timing, month/year of COVID-19  
231 diagnosis (classified into 4-month intervals), and U.S census region of reporting institution. These covariates were identified  
232 *a priori* as the most clinically relevant for COVID-19 severity and were included in a single model, given a sufficient number  
233 of events and corresponding degrees of freedom. Because the ordinal outcome was assessed over a given patients' total  
234 follow-up period, the model included an offset for (log) follow-up time. The results are presented as adjusted odds ratio  
235 (ORs) with 95% CIs. Model stability was assessed by comparing unadjusted and adjusted models and variance inflation  
236 factors. Graphical methods were used to verify the proportional odds assumption (*supplementary appendix- figure I*). We  
237 used the  $e$  value to quantify sensitivity to unmeasured confounding for the observed OR for race/ethnicity.[33], [34] Multiple

238 imputation (20 imputed datasets) was used to impute missing and unknown data for all variables included in the analysis,  
239 with some exceptions: unknown ECOG performance score and unknown cancer status were not imputed and treated as a  
240 separate category in analyses. Imputation was performed on the largest dataset possible (that is, after removing test cases and  
241 other manual exclusions, but before applying specific exclusion criteria). Analyses were completed using R v4.0.4 (R  
242 Foundation for Statistical Computing, Vienna, Austria), including the rms and EValue extension packages. Descriptive  
243 statistics for males with BC and females with metastatic BC are presented separately but multivariable modeling was not  
244 attempted due to small sample sizes.

245

## 246 **RESULTS**

### 247 **Baseline characteristics and COVID-19 Outcomes in female patients with BC**

248 Of the total 12,034 reports on all cancers submitted to the CCC19 registry at the time of this analysis, 1,383 females with BC  
249 met the eligibility criteria and were included (**Figure I**). The median age for the cohort was 61 years (IQR 51-72 years) and  
250 median follow-up was 90 (IQR 30-135) days. BC subtypes by biomarker distribution in CCC19 registry included: 52%  
251 HR+/HER2-, 14% HR+/HER2+, 8% HR-/HER2+, 11% triple negative, and 14% unknown or missing. BC subtype  
252 distribution based on biomarkers in the CCC19 cohort are similar to SEER data which adds broader applicability of these  
253 findings.[35] With regards to BC status, 27% were in remission/NED for over 5 years and 32% were in remission/NED for  
254 less than 5 years since the initial BC diagnosis and 32% had active cancer (13% had active and responding, 12% had active  
255 and stable and 7% had active and progressing cancer). 57% of patients had received some form of anti-cancer therapy within  
256 3 months of COVID-19 diagnosis. The unadjusted total all-cause mortality and hospitalization rate, included in the primary  
257 ordinal outcome, for the female cohort was 9% and 37%, respectively. However, the unadjusted rates of COVID-19  
258 outcomes varied by their BC status; females with active and progressing cancer had the highest all-cause mortality (38%) and  
259 hospitalization rates (72%) compared to the rest of the group (*supplementary appendix - table I*). Other clinical outcomes for  
260 the female cohort included 30-day all-cause mortality (6%), mechanical ventilation (5%) and ICU care (8%). Additional  
261 details on patients with BC and COVID-19 by specific characteristics of interest are presented below.

262

263

264 ***Characteristics of female patients with BC and COVID-19 by Race/Ethnicity***

265 Of the 1383 female patients, 736 (53%) were NHW, 289 (21%) Black, 235 (17%) Hispanic, 45 (3%) AAPI, and 78 (6%)  
266 belonged to Other racial/ethnic group. Baseline characteristics of females stratified by race/ethnicity groups are shown in  
267 **Table I**. Hispanic and AAPI patients were younger with median ages of 53 (IQR 46-62) and 54 (IQR 43-73) years  
268 respectively, compared to 64 years in NHW (IQR 54-76) and 61 years (IQR 52-69) in Black patients. Prevalence of smokers  
269 were higher among NHW (35%), Black (33%) and Other (32%) racial/ethnic groups compared to Hispanic (23%) and AAPI  
270 (18%) patients. Rates of obesity was higher in Black (54%) and lower in AAPI (29%) compared to NHW (42%) patients.  
271 Cardiovascular comorbidity was less common in Hispanic patients (6%), while diabetes mellitus was more prevalent among  
272 Black patients (34%) compared to NHW patients (24% and 17% respectively). Compared to NHW, Hispanic patients had  
273 higher rates of active cancer (24% responding, 15% stable, and 9% progressing) and had higher rates of receipt of anti-cancer  
274 systemic therapy within 3 months of COVID-19 diagnosis (37% chemotherapy, 25% targeted therapy, 39% endocrine  
275 therapy). Similarly, AAPI patients also had higher rates of active cancer (7% responding, 22% stable, and 13% progressing)  
276 and received anti-cancer systemic therapy within 3 months of COVID-19 diagnosis (24% chemotherapy, 18% targeted  
277 therapy, 33% endocrine therapy) compared to NHW patients with active cancer [9% responding, 12% stable, and 6%  
278 progressing] who received anti-cancer systemic therapy [16% chemotherapy, 15% targeted therapy, 38% endocrine therapy]).  
279 With regards to baseline severity of COVID-19 at presentation, 39% of Black and 38% of AAPI patients presented with  
280 moderate or higher severity of COVID-19 infection compared to 27% in both NHW and Hispanic patients. **Table II**  
281 summarizes the clinical outcomes, complications, and interventions, stratified by race/ethnicity.

282

283 ***Characteristics of female patients with Metastatic Breast Cancer (MBC) and COVID-19***

284 Female patients with MBC consisted of 17% of the cohort (N=233), with median age 58 years [IQR 50-68]. Racial/Ethnic  
285 groups consisted of 46% NHW, 24% Black, 21% Hispanics, 4% AAPI and 4% Other. Most patients with MBC were never  
286 smokers (70%) and non-obese (60%). The predominant tumor biology was HR+/HER2- (42%) followed by  
287 HR+/HER2+(23%). The most common sites of metastases were bone (58%), lung (28%), and liver (26%). A high percentage  
288 (87%) had received anti-cancer treatment within 3 months prior to COVID-19 diagnosis and 32% had active and progressing  
289 cancer. The unadjusted total all-cause mortality and hospitalization rate in females with MBC was 19% and 53%

290 respectively. Further details of baseline characteristics and unadjusted rates of COVID-19 outcomes, complications and  
291 interventions are presented in *supplementary appendix – Table IIA and IIB*

292

### 293 **BC Treatment Characteristics**

294 758 (55%) out of 1383 female patients with BC received some form of systemic treatment within 3 months prior to COVID-  
295 19 diagnosis, and specific drug information was available for 679 (90%) (**Table III**). Of these 679 patients, the most common  
296 systemic therapy was endocrine therapy alone (n=336, 49.5%). This was followed by chemotherapy in 163 (24%) patients  
297 who received it either as single agent (n=55, 8%) or combination chemotherapy (n=60, 9%) or combined with anti-HER2  
298 therapy (n=48, 7%). 78 (11.5%) patients received anti-HER2 therapy with or without endocrine therapy, and 63 (9%) patients  
299 received CDK4/6 inhibitors with or without endocrine therapy.

300

### 301 **Prognostic Factors associated with COVID-19 severity**

302 After adjusting for baseline demographic, clinical, and spatiotemporal factors in multivariable analysis model, factors  
303 associated with worse outcomes in females with BC included older age (aOR per decade, 1.48 [95% CI, 1.32 – 1.67]); Black  
304 (aOR, 1.74 [95% CI, 1.24 - 2.45]), AAPI (aOR, 3.40 [95% CI, 1.70 - 6.79]), and Other (aOR, 2.97 [95% CI, 1.71 - 5.17])  
305 racial/ethnic group; cardiovascular (aOR, 2.26 [95% CI, 1.63 – 3.15]) and pulmonary (aOR, 1.65 [95% CI, 1.20 – 2.29])  
306 comorbidities; diabetes mellitus (aOR, 2.25 [95% CI, 1.66 – 3.04]); worse ECOG PS (ECOG PS 1: aOR, 1.74 [95% CI, 1.22  
307 – 2.48]; ECOG PS  $\geq$ 2: aOR, 7.78 [95% CI, 4.83 – 12.5]); and active and progressing cancer status (aOR, 12.5 [95% CI, 6.89  
308 – 22.6]). Association between Hispanic ethnicity, obesity, preexisting renal disease, anti-cancer treatment modalities  
309 including all forms of systemic therapy and loco-regional therapy, month/year and geographic region of COVID-19 diagnosis  
310 and COVID-19 severity did not reach statistical significance (**Table IV**). The e value for the COVID-19 severity OR and CI  
311 for each racial group are shown in *supplementary appendix - Table III*. This value demonstrates the impact of unknown  
312 *\_residual\_* confounding above that adjusted for by including adjustment variables in the multivariable model. For example,  
313 an unmeasured confounder would need to be associated with both race and mortality with a odds ratio of at least 1.97 to fully  
314 attenuate the observed association for Black females and the odds ratio would need to be at least 1.47 for the null-  
315 hypothesized value (1.0) to be included in the CI. Similarly, E value estimates are noted for AAPI and Other groups. The

316 unmeasured confounding for other races based on the e value is larger than most documented associations in the CCC19  
317 cohort. [3]

318

### 319 **Male patients with BC and COVID-19**

320 Male patients with BC were evaluated separately as part of exploratory analysis. The median age for male BC cohort (N=25)  
321 was 67 years [IQR 60-75]. Racial/ethnic composition consisted of NHW (52%) followed by Black (32%) males. Most males  
322 with BC were non-smokers (72%) and diabetes mellitus was the predominant comorbidity (44%). The hospitalization rate  
323 was 60% and all-cause mortality was 20%. Additional clinical characteristics, complications, interventions, and unadjusted  
324 outcomes among males with BC in the CCC19 registry are provided in *supplementary appendix – table IV*.

325

### 326 **DISCUSSION**

327 In this large, multi-institutional and racially diverse cohort of females with BC and COVID-19 from CCC19 registry, we  
328 assessed the clinical impact of COVID-19. The all-cause mortality from COVID-19 was 9% and hospitalization rate was  
329 37%, which is numerically lower than in the entire CCC19 cohort at 14% and 58%, and other previously reported studies of  
330 COVID-19 in patients with cancer.[3]–[8], [36] These differences in outcomes could indicate differences in the  
331 immunocompromised status of patients due to intensity of therapy regimens, complex comorbidities, or concomitant  
332 medications, which may affect outcomes. Females with BC, however, form a heterogenous group, and the rates of outcomes  
333 varied widely with their disease status; patients with active and progressing cancer had the highest total all-cause mortality  
334 (38%) and hospitalization rates (72%).

335

336 We observed older age, pre-existing cardiovascular and pulmonary comorbidities, diabetes mellitus, worse ECOG PS, and  
337 active and progressing cancer status were associated with adverse COVID-19 outcomes in females with BC. Prior studies  
338 have reported similar factors to be associated with adverse COVID-19 outcomes in patients with all cancer types. The  
339 majority of these studies have reported older age to be an important prognostic factor for adverse outcomes from COVID-19,  
340 including mortality, which is consistent with data presented here.[3], [9], [10], [36], [37] Non-cancer comorbidities,  
341 contributing to poor COVID-19 outcomes, as noted in our study, have also been a consistent finding in patients with and  
342 without a cancer diagnosis.[3], [9], [10], [37], [38] Similarly, poor ECOG PS in cancer patients has been noted to be an

343 important factor associated with worse COVID-19 severity, including our study.[3], [8], [10] While obesity was reported in  
344 some cancer studies to have a negative impact on COVID-19 [3], [37], our study did not identify this association. In this  
345 cohort of females with BC, all forms of anti-cancer therapy were thoroughly evaluated and none of the systemic therapies  
346 including chemotherapy; endocrine therapy; and targeted therapy (anti-HER2, CDK4/6 inhibitors, other non-HER2 or non-  
347 CDK4/6 inhibitors); or loco-regional therapy (surgery and radiation) received within 3 months of COVID-19 diagnosis was  
348 significantly associated with adverse COVID-19 outcomes. Our finding suggests that systemic therapy for females with BC  
349 may not add excess COVID-19 risk. Multiple large cohort studies and meta-analysis of patients with cancer diagnosed with  
350 COVID-19 similarly did not identify active anti-cancer therapy, specifically chemotherapy, as a factor associated with  
351 adverse COVID-19 outcomes, which is consistent with our results.[4], [5], [8], [36], [39], [40] However, in contrast, some  
352 studies of patients with other cancers have shown a negative impact of chemotherapy[3], [9], [10], [37] and immunotherapy  
353 use [37]. These findings have important clinical implications while counselling and providing patient care during the  
354 pandemic.

355  
356 We also report important findings related to the impact of racial/ethnic inequities in females with BC and COVID-19, which  
357 adds to the growing body of literature on COVID-19 related racial/ethnic disparities. In our study, Black females with BC  
358 had significantly worse COVID-19 outcomes compared to NHW females. Multiple studies have similarly reported Black  
359 patients in US with and without cancer diagnosis having significantly worse COVID-19 outcomes [3], [6], [11] however, our  
360 study is the first to show such racial/ethnic disparities in COVID-19 outcomes in females with BC. There was no statistically  
361 significant association of worse outcomes for Hispanic females compared to NHW females. This is different in comparison to  
362 our overall CCC19 cohort[3], and may be explained by younger age and lower rates of comorbid conditions in Hispanic  
363 females compared to NHW females. We also found females belonging to AAPI, and Other racial/ethnic group to have worse  
364 COVID-19 outcomes. Notably, females belonging to Black, AAPI and Other racial/ethnic groups presented with higher rates  
365 of moderate or severe symptoms of COVID-19 at baseline, which likely contributed to their worse outcomes. This in turn is  
366 possibly related to barriers to health care access, and other socio-cultural reasons for delay in seeking early medical care.  
367 Future studies including social determinants of health, access to health care, and lifestyle behaviors, among others, are  
368 warranted to identify barriers contributing to worse clinical presentation in racial/ethnic minority groups, and eventually  
369 impacting future health policies.

370

371 In summary, this is one of the largest cohort studies to evaluate the clinical impact of COVID-19 on females with BC.  
372 Strengths of our study include standardized data collection on the most common cancer in females in the US and large  
373 sample size to evaluate the effect of major clinical and demographic factors. The study had representative population by race  
374 and ethnicity from geographically diverse areas and variable time/period of COVID-19 diagnosis. In addition, our study has  
375 detailed manually collected information on both cancer status and treatment modalities which contrasts with other studies that  
376 have utilized either of these variables as surrogate. Limitations of this study include the retrospective nature of data and  
377 inherent potential for confounding because of its observational nature. It's possible that ascertainment bias could have led to  
378 some of the high values observed in specific groups such as females with MBC and those with active and progressing cancer.  
379 Additional information on drivers for inequity such as socio-economic status, occupation, income, residence, education, and  
380 insurance status may have provided added insights on the root causes for disparities; however, unavailability of these factors  
381 does not nullify our current findings of existing racial disparities in COVID-19 outcomes in females with BC. Vaccination  
382 status was not part of this study as vaccines were not available during the predominant time frame for this cohort. Data  
383 presented here including the risk of hospitalization and death applies to the specific COVID-19 variants prevalent during the  
384 study period. Despite these limitations, the study reports important sociodemographic and clinical factors that aid in  
385 identifying females with BC who are at increased risk for severe COVID-19 outcomes.

386

387 Our study addresses an important knowledge gap in patients with BC diagnosed with COVID-19 using the CCC19 registry.  
388 In addition to clinical and demographic factors associated with adverse COVID-19 outcomes, racial/ethnic disparities  
389 reported here significantly contribute to the growing literature. At this stage, it is irrefutable that one of the principal far-  
390 reaching messages the pandemic has conveyed is that any such major stressors on the health care system increases risk of  
391 detrimental outcomes to the most vulnerable patient population, including the underrepresented and the underserved. These  
392 are important considerations for future resource allocation strategies and policy interventions. We also report an important  
393 finding that cancers that are active and progressing are associated with severe COVID-19 outcomes. During the ongoing  
394 pandemic, this has significant implications for shared decision-making between patients and physicians.

395

396



397 **REFERENCES**

- 398 [1] “WHO Coronavirus (COVID-19) Dashboard.” <https://covid19.who.int> (accessed Dec. 14, 2021).
- 399 [2] CDC, “COVID Data Tracker,” *Centers for Disease Control and Prevention*, Mar. 28, 2020.
- 400 <https://covid.cdc.gov/covid-data-tracker> (accessed Dec. 14, 2021).
- 401 [3] P. Grivas *et al.*, “Association of clinical factors and recent anticancer therapy with COVID-19 severity among patients
- 402 with cancer: a report from the COVID-19 and Cancer Consortium,” *Ann Oncol*, vol. 32, no. 6, pp. 787–800, Jun. 2021,
- 403 doi: 10.1016/j.annonc.2021.02.024.
- 404 [4] M. C. Garassino *et al.*, “COVID-19 in patients with thoracic malignancies (TERAVOLT): first results of an
- 405 international, registry-based, cohort study,” *Lancet Oncol*, vol. 21, no. 7, pp. 914–922, Jul. 2020, doi: 10.1016/S1470-
- 406 2045(20)30314-4.
- 407 [5] L. Y. Lee *et al.*, “COVID-19 mortality in patients with cancer on chemotherapy or other anticancer treatments: a
- 408 prospective cohort study,” *Lancet*, vol. 395, no. 10241, pp. 1919–1926, Jun. 2020, doi: 10.1016/S0140-
- 409 6736(20)31173-9.
- 410 [6] Q. Wang, N. A. Berger, and R. Xu, “Analyses of Risk, Racial Disparity, and Outcomes Among US Patients With
- 411 Cancer and COVID-19 Infection,” *JAMA Oncol*, vol. 7, no. 2, pp. 220–227, Feb. 2021, doi:
- 412 10.1001/jamaoncol.2020.6178.
- 413 [7] E. de Azambuja *et al.*, “Impact of solid cancer on in-hospital mortality overall and among different subgroups of
- 414 patients with COVID-19: a nationwide, population-based analysis,” *ESMO Open*, vol. 5, no. 5, p. e000947, Sep. 2020,
- 415 doi: 10.1136/esmoopen-2020-000947.
- 416 [8] L. Albiges *et al.*, “Determinants of the outcomes of patients with cancer infected with SARS-CoV-2: results from the
- 417 Gustave Roussy cohort,” *Nat Cancer*, vol. 1, no. 10, pp. 965–975, Oct. 2020, doi: 10.1038/s43018-020-00120-5.
- 418 [9] N. Sharafeldin *et al.*, “Outcomes of COVID-19 in Patients With Cancer: Report From the National COVID Cohort
- 419 Collaborative (N3C),” *J Clin Oncol*, vol. 39, no. 20, pp. 2232–2246, Jul. 2021, doi: 10.1200/JCO.21.01074.
- 420 [10] A. Lièvre *et al.*, “Risk factors for Coronavirus Disease 2019 (COVID-19) severity and mortality among solid cancer
- 421 patients and impact of the disease on anticancer treatment: A French nationwide cohort study (GCO-002 CACOVID-
- 422 19),” *Eur J Cancer*, vol. 141, pp. 62–81, Dec. 2020, doi: 10.1016/j.ejca.2020.09.035.
- 423 [11] CDC, “Community, Work, and School,” *Centers for Disease Control and Prevention*, Feb. 11, 2020,
- 424 <https://www.cdc.gov/coronavirus/2019-ncov/community/health-equity/racial-ethnic-disparities/index.html> (accessed
- 425 Oct. 04, 2021).
- 426 [12] G. A. Millett *et al.*, “Assessing differential impacts of COVID-19 on black communities,” *Ann Epidemiol*, vol. 47, pp.
- 427 37–44, Jul. 2020, doi: 10.1016/j.annepidem.2020.05.003.
- 428 [13] L. S. Muñoz-Price *et al.*, “Racial Disparities in Incidence and Outcomes Among Patients With COVID-19,” *JAMA*
- 429 *Network Open*, vol. 3, no. 9, p. e2021892, Sep. 2020, doi: 10.1001/jamanetworkopen.2020.21892.
- 430 [14] C. P. Gross, U. R. Essien, S. Pasha, J. R. Gross, S. Wang, and M. Nunez-Smith, “Racial and Ethnic Disparities in
- 431 Population-Level Covid-19 Mortality,” *J Gen Intern Med*, vol. 35, no. 10, pp. 3097–3099, Oct. 2020, doi:
- 432 10.1007/s11606-020-06081-w.
- 433 [15] E. G. Price-Haywood, J. Burton, D. Fort, and L. Seoane, “Hospitalization and Mortality among Black Patients and
- 434 White Patients with Covid-19,” *N Engl J Med*, vol. 382, no. 26, pp. 2534–2543, Jun. 2020, doi:
- 435 10.1056/NEJMsa2011686.
- 436 [16] K. M. J. Azar *et al.*, “Disparities In Outcomes Among COVID-19 Patients In A Large Health Care System In
- 437 California,” *Health Aff (Millwood)*, vol. 39, no. 7, pp. 1253–1262, Jul. 2020, doi: 10.1377/hlthaff.2020.00598.
- 438 [17] K. Mackey *et al.*, “Racial and Ethnic Disparities in COVID-19-Related Infections, Hospitalizations, and Deaths : A
- 439 Systematic Review,” *Ann Intern Med*, vol. 174, no. 3, pp. 362–373, Mar. 2021, doi: 10.7326/M20-6306.
- 440 [18] S. Garg *et al.*, “Hospitalization Rates and Characteristics of Patients Hospitalized with Laboratory-Confirmed
- 441 Coronavirus Disease 2019 - COVID-NET, 14 States, March 1-30, 2020,” *MMWR Morb Mortal Wkly Rep*, vol. 69, no.
- 442 15, pp. 458–464, Apr. 2020, doi: 10.15585/mmwr.mm6915e3.
- 443 [19] U. V. Mahajan and M. Larkins-Pettigrew, “Racial demographics and COVID-19 confirmed cases and deaths: a
- 444 correlational analysis of 2886 US counties,” *J Public Health (Oxf)*, vol. 42, no. 3, pp. 445–447, Aug. 2020, doi:
- 445 10.1093/pubmed/fdaa070.
- 446 [20] S. J. Kim and W. Bostwick, “Social Vulnerability and Racial Inequality in COVID-19 Deaths in Chicago,” *Health*
- 447 *Educ Behav*, vol. 47, no. 4, pp. 509–513, Aug. 2020, doi: 10.1177/1090198120929677.
- 448 [21] J. Fu *et al.*, “Racial Disparities in COVID-19 Outcomes Among Black and White Patients With Cancer,” *JAMA*
- 449 *Network Open*, vol. 5, no. 3, p. e224304, Mar. 2022, doi: 10.1001/jamanetworkopen.2022.4304.

- 450 [22] R. L. Siegel, K. D. Miller, H. E. Fuchs, and A. Jemal, "Cancer Statistics, 2021," *CA Cancer J Clin*, vol. 71, no. 1, pp.  
451 7–33, Jan. 2021, doi: 10.3322/caac.21654.
- 452 [23] H. Sung *et al.*, "Global Cancer Statistics 2020: GLOBOCAN Estimates of Incidence and Mortality Worldwide for 36  
453 Cancers in 185 Countries," *CA: A Cancer Journal for Clinicians*, vol. 71, no. 3, pp. 209–249, 2021, doi:  
454 10.3322/caac.21660.
- 455 [24] "Cancer of the Breast (Female) - Cancer Stat Facts," *SEER*. <https://seer.cancer.gov/statfacts/html/breast.html> (accessed  
456 Oct. 06, 2021).
- 457 [25] R. T. Chlebowski *et al.*, "Ethnicity and breast cancer: factors influencing differences in incidence and outcome," *J Natl*  
458 *Cancer Inst*, vol. 97, no. 6, pp. 439–448, Mar. 2005, doi: 10.1093/jnci/dji064.
- 459 [26] J. Bigby and M. D. Holmes, "Disparities across the breast cancer continuum," *Cancer Causes Control*, vol. 16, no. 1,  
460 pp. 35–44, Feb. 2005, doi: 10.1007/s10552-004-1263-1.
- 461 [27] C. G. Yedjou *et al.*, "Health and Racial Disparity in Breast Cancer," *Adv Exp Med Biol*, vol. 1152, pp. 31–49, 2019,  
462 doi: 10.1007/978-3-030-20301-6\_3.
- 463 [28] P. Vuagnat *et al.*, "COVID-19 in breast cancer patients: a cohort at the Institut Curie hospitals in the Paris area," *Breast*  
464 *Cancer Res*, vol. 22, no. 1, p. 55, May 2020, doi: 10.1186/s13058-020-01293-8.
- 465 [29] K. Kalinsky *et al.*, "Characteristics and outcomes of patients with breast cancer diagnosed with SARS-Cov-2 infection  
466 at an academic center in New York City," *Breast Cancer Res Treat*, pp. 1–4, May 2020, doi: 10.1007/s10549-020-  
467 05667-6.
- 468 [30] N. M. Kuderer *et al.*, "Clinical impact of COVID-19 on patients with cancer (CCC19): a cohort study," *Lancet*, vol.  
469 395, no. 10241, pp. 1907–1918, Jun. 2020, doi: 10.1016/S0140-6736(20)31187-9.
- 470 [31] COVID-19 and Cancer Consortium. Electronic address: [jeremy.warner@vumc.org](mailto:jeremy.warner@vumc.org) and COVID-19 and Cancer  
471 Consortium, "A Systematic Framework to Rapidly Obtain Data on Patients with Cancer and COVID-19: CCC19  
472 Governance, Protocol, and Quality Assurance," *Cancer Cell*, vol. 38, no. 6, pp. 761–766, Dec. 2020, doi:  
473 10.1016/j.ccell.2020.10.022.
- 474 [32] "PHIN Vocabulary | CDC," Sep. 29, 2021. <https://www.cdc.gov/phin/resources/vocabulary/index.html> (accessed Oct.  
475 05, 2021).
- 476 [33] T. J. VanderWeele and P. Ding, "Sensitivity Analysis in Observational Research: Introducing the E-Value," *Ann Intern*  
477 *Med*, vol. 167, no. 4, pp. 268–274, Aug. 2017, doi: 10.7326/M16-2607.
- 478 [34] S. Haneuse, T. J. VanderWeele, and D. Arterburn, "Using the E-Value to Assess the Potential Effect of Unmeasured  
479 Confounding in Observational Studies," *JAMA*, vol. 321, no. 6, pp. 602–603, Feb. 2019, doi:  
480 10.1001/jama.2018.21554.
- 481 [35] "Female Breast Cancer Subtypes - Cancer Stat Facts," *SEER*. [https://seer.cancer.gov/statfacts/html/breast-](https://seer.cancer.gov/statfacts/html/breast-subtypes.html)  
482 *subtypes.html* (accessed Feb. 26, 2022).
- 483 [36] H. Zhang *et al.*, "Clinical Characteristics and Outcomes of COVID-19-Infected Cancer Patients: A Systematic Review  
484 and Meta-Analysis," *J Natl Cancer Inst*, vol. 113, no. 4, pp. 371–380, Apr. 2021, doi: 10.1093/jnci/djaa168.
- 485 [37] M. Chavez-MacGregor, X. Lei, H. Zhao, P. Scheet, and S. H. Giordano, "Evaluation of COVID-19 Mortality and  
486 Adverse Outcomes in US Patients With or Without Cancer," *JAMA Oncology*, Oct. 2021, doi:  
487 10.1001/jamaoncol.2021.5148.
- 488 [38] CDC, "Coronavirus Disease 2019 (COVID-19)," *Centers for Disease Control and Prevention*, Feb. 11, 2020.  
489 <https://www.cdc.gov/coronavirus/2019-ncov/science/science-briefs/underlying-evidence-table.html> (accessed Nov. 10,  
490 2021).
- 491 [39] H. Liu *et al.*, "The effect of anticancer treatment on cancer patients with COVID-19: A systematic review and meta-  
492 analysis," *Cancer Med*, vol. 10, no. 3, pp. 1043–1056, Feb. 2021, doi: 10.1002/cam4.3692.
- 493 [40] J. Jee *et al.*, "Chemotherapy and COVID-19 Outcomes in Patients With Cancer," *J Clin Oncol*, vol. 38, no. 30, pp.  
494 3538–3546, Oct. 2020, doi: 10.1200/JCO.20.01307.
- 495

497

498

499 **DATA AVAILABILITY:** <https://datadryad.org/stash/dataset/doi:10.5061/dryad.1g1jwsv10>

500 **ETHICS APPROVAL:**

501 This study was exempt from institutional review board (IRB) review (VUMC IRB#200467) and was approved by IRBs at  
502 participating sites per institutional policy.

503

504 **ACKNOWLEDGEMENTS:** We thank all members of the CCC19 steering committee: Toni K. Choueiri, Narjust Duma,

505 Dimitrios Farmakiotis, Petros Grivas, Gilberto de Lima Lopes Jr., Corrie A. Painter, Solange Peters, Brian I. Rini, Dimpy P.

506 Shah, Michael A. Thompson, and Jeremy L. Warner, for their invaluable guidance of the COVID-19 and Cancer Consortium.

507

| <b>Table I: Baseline Characteristics by Race/Ethnicity</b> |                                 |                                   |                                      |                                |                                |                                   |
|------------------------------------------------------------|---------------------------------|-----------------------------------|--------------------------------------|--------------------------------|--------------------------------|-----------------------------------|
|                                                            | <b>NHW</b><br>(n = 736,<br>53%) | <b>Black</b><br>(n = 289,<br>21%) | <b>Hispanic</b><br>(n = 235,<br>17%) | <b>AAPI</b><br>(n = 45,<br>3%) | <b>Others</b><br>(n=78,<br>6%) | <b>All</b><br>(n = 1383,<br>100%) |
| <b>Median Age, years<sup>a</sup></b><br>[IQR]              | 64 (54-76)                      | 61 (52-69)                        | 53 (46-62)                           | 54 (43-73)                     | 62 (53-71)                     | 61 (51-72)                        |
| <b>Median follow-up, days</b><br>[IQR]                     | 90 (30-135)                     | 90 (30-180)                       | 90 (30-135)                          | 42 (21-90)                     | 70 (30-180)                    | 90 (30-135)                       |
| <b>Smoking status</b>                                      |                                 |                                   |                                      |                                |                                |                                   |
| Never                                                      | 460 (62%)                       | 186 (64%)                         | 180 (77%)                            | 35 (78%)                       | 50 (64%)                       | 911 (66%)                         |
| Current or Former                                          | 261 (35%)                       | 95 (33%)                          | 53 (23%)                             | 8 (18%)                        | 25 (32%)                       | 442 (32%)                         |
| Missing/unknown                                            | 15 (2%)                         | 8 (3%)                            | 2 (1%)                               | 2 (4%)                         | 3(4%)                          | 30 (2%)                           |
| <b>Obesity</b>                                             |                                 |                                   |                                      |                                |                                |                                   |
| No                                                         | 421 (57%)                       | 133 (46%)                         | 116 (49%)                            | 32 (71%)                       | 45 (58%)                       | 747 (54%)                         |
| Yes                                                        | 308 (42%)                       | 156 (54%)                         | 116 (49%)                            | 13 (29%)                       | 33 (42%)                       | 626 (45%)                         |
| Missing/unknown                                            | 7 (1%)                          | 0 (0%)                            | 3 (1%)                               | 0 (0%)                         | 0 (0%)                         | 10 (1%)                           |
| <b>Comorbidities<sup>b</sup></b>                           |                                 |                                   |                                      |                                |                                |                                   |
| Cardiovascular                                             | 179 (24%)                       | 60 (21%)                          | 14 (6%)                              | 7 (16%)                        | 11 (14%)                       | 271 (20%)                         |
| Pulmonary                                                  | 125 (17%)                       | 65 (22%)                          | 33 (14%)                             | <5 (<11%)                      | 7 (9%)                         | 234 (17%)                         |
| Renal Disease                                              | 66 (9%)                         | 31 (11%)                          | 13 (6%)                              | <5 (<11%)                      | <5 (<6%)                       | 115 (8%)                          |
| Diabetes mellitus                                          | 127 (17%)                       | 98 (34%)                          | 51 (22%)                             | 10 (22%)                       | 20 (26%)                       | 306 (22%)                         |
| Missing/unknown                                            | 9 (1%)                          | 1 (<1%)                           | 5 (2%)                               | 0 (0%)                         | 0 (0%)                         | 15 (1%)                           |
| <b>ECOG performance status</b>                             |                                 |                                   |                                      |                                |                                |                                   |
| 0                                                          | 314 (43%)                       | 130 (45%)                         | 123 (52%)                            | 18 (40%)                       | 32 (41%)                       | 617 (45%)                         |
| 1                                                          | 135 (18%)                       | 72 (25%)                          | 48 (20%)                             | 10 (22%)                       | 16 (21%)                       | 281 (20%)                         |
| 2+                                                         | 69 (9%)                         | 33 (11%)                          | 15 (6%)                              | 5 (11%)                        | 5 (6%)                         | 127 (9%)                          |
| Unknown                                                    | 218 (30%)                       | 53 (18%)                          | 49 (21%)                             | 12 (27%)                       | 25 (32%)                       | 357 (26%)                         |
| Missing                                                    | 0 (0%)                          | 1 (<1%)                           | 0 (0%)                               | 0 (0%)                         | 0 (0%)                         | 1 (<1%)                           |
| <b>Region</b>                                              |                                 |                                   |                                      |                                |                                |                                   |
| Northeast                                                  | 247 (34%)                       | 101 (35%)                         | 106 (45%)                            | 12 (27%)                       | 26 (33%)                       | 492 (36%)                         |
| Midwest                                                    | 239 (32%)                       | 110 (38%)                         | 23 (10%)                             | 8 (18%)                        | 12 (15%)                       | 392 (28%)                         |
| South                                                      | 116 (16%)                       | 58 (20%)                          | 27 (11%)                             | X*                             | 14 (18%)                       | 218 (16%)                         |
| West                                                       | 128 (17%)                       | 16 (6%)                           | 77 (33%)                             | 22 (49%)                       | 24 (31%)                       | 267 (19%)                         |
| Undesignated                                               | 6 (1%)                          | 4 (1%)                            | 2 (1%)                               | 3 (7%)*                        | 2 (3%)                         | 14 (1%)                           |
| <b>Month/Year of COVID-19 diagnosis</b>                    |                                 |                                   |                                      |                                |                                |                                   |
| Jan-Apr 2020                                               | 140 (19%)                       | 74 (26%)                          | 41 (17%)                             | 8 (18%)                        | 20 (26%)                       | 283 (20%)                         |
| May-Aug 2020                                               | 279 (38%)                       | 141 (49%)                         | 101 (43%)                            | 24 (53%)                       | 30 (38%)                       | 575 (42%)                         |
| Sept-Dec 2020                                              | 197 (27%)                       | 42 (15%)                          | 50 (21%)                             | 5 (11%)                        | 16 (21%)                       | 310 (22%)                         |
| Jan-Jun 2021                                               | 118 (16%)                       | 32 (11%)                          | 41 (17%)                             | 7 (16%)                        | 12 (15%)                       | 210 (15%)                         |
| Missing/unknown                                            | 2 (<1%)                         | 0 (0%)                            | 2 (1%)                               | 1 (2%)                         | 0 (0%)                         | 5 (<1%)                           |
| <b>Area of patient residence</b>                           |                                 |                                   |                                      |                                |                                |                                   |
| Urban                                                      | 193 (26%)                       | 136 (47%)                         | 124 (53%)                            | 13 (29%)                       | 30 (38%)                       | 496 (36%)                         |
| Suburban                                                   | 315 (43%)                       | 77 (27%)                          | 65 (28%)                             | 17 (38%)                       | 31 (40%)                       | 505 (37%)                         |
| Rural                                                      | 81 (11%)                        | 7 (2%)                            | 9 (4%)                               | X*                             | 0 (0%)                         | 98 (7%)                           |

|                                                             |           |           |           |           |           |           |
|-------------------------------------------------------------|-----------|-----------|-----------|-----------|-----------|-----------|
| Missing/unknown                                             | 147 (20%) | 69 (24%)  | 37 (16%)  | 15 (33%)* | 17 (22%)  | 284 (21%) |
| <b>Treatment center characteristics</b>                     |           |           |           |           |           |           |
| Academic Medical Center                                     | 123 (17%) | 102 (35%) | 43 (18%)  | 7 (16%)   | 11 (14%)  | 286 (21%) |
| Community Practice                                          | 238 (32%) | 51 (18%)  | 44 (19%)  | X*        | 23 (29%)  | 359 (26%) |
| Tertiary Care Center                                        | 375 (51%) | 136 (47%) | 147 (63%) | 35 (78%)  | 44 (56%)  | 737 (53%) |
| Missing/unknown                                             | 0 (0%)    | 0 (0%)    | 1 (<1%)   | 3 (7%)*   | 0 (0%)    | 1 (<1%)   |
| <b>Receptor status</b>                                      |           |           |           |           |           |           |
| HR+/HER2-                                                   | 419 (57%) | 135 (47%) | 102 (43%) | 22 (49%)  | 43 (55%)  | 721 (52%) |
| HR+/HER2+                                                   | 102 (14%) | 35 (12%)  | 43 (18%)  | 7 (16%)   | 9 (12%)   | 196 (14%) |
| HR-/HER2+                                                   | 46 (6%)   | 28 (10%)  | 32 (14%)  | X*        | X*        | 111 (8%)  |
| Triple Negative                                             | 57 (8%)   | 54 (19%)  | 35 (15%)  | 5 (11%)   | 7 (9%)    | 158 (11%) |
| Missing/unknown                                             | 112 (15%) | 37 (13%)  | 23 (10%)  | 11 (24%)* | 19 (24%)* | 197 (14%) |
| <b>Cancer status</b>                                        |           |           |           |           |           |           |
| Remission/NED, >5 yrs                                       | 247 (34%) | 76 (26%)  | 23 (10%)  | 9 (20%)   | 20 (26%)  | 375 (27%) |
| Remission/NED, <5 yrs                                       | 234 (32%) | 100 (35%) | 77 (33%)  | 11 (24%)  | 26 (33%)  | 448 (32%) |
| Active and responding                                       | 68 (9%)   | 35 (12%)  | 56 (24%)  | X*        | 11 (14%)  | 173 (13%) |
| Active and stable                                           | 91 (12%)  | 28 (10%)  | 35 (15%)  | 10 (22%)  | 5 (6%)    | 169 (12%) |
| Active and progressing                                      | 41 (6%)   | 27 (9%)   | 20 (9%)   | 6 (13%)   | X*        | 97 (7%)   |
| Unknown                                                     | 48 (7%)   | 19 (7%)   | 22 (9%)   | 6 (13%)*  | 15 (19%)* | 104 (8%)  |
| Missing                                                     | 7 (1%)    | 4 (1%)    | 2 (1%)    | 3 (7%)    | 1 (1%)    | 17 (1%)   |
| <b>Timing of anti-cancer therapy</b>                        |           |           |           |           |           |           |
| Never/After COVID-19                                        | 24 (3%)   | 10 (3%)   | 7 (3%)    | X*        | 7 (9%)    | 50 (4%)   |
| 0-4 weeks                                                   | 364 (49%) | 135 (47%) | 158 (67%) | 25 (56%)  | 39 (50%)  | 721 (52%) |
| 1-3 months                                                  | 26 (4%)   | 20 (7%)   | 19 (8%)   | 0 (0%)    | X*        | 69 (5%)   |
| >3 months                                                   | 303 (41%) | 118 (41%) | 45 (19%)  | 18 (40%)  | 24 (31%)  | 508 (37%) |
| Missing/unknown                                             | 19 (3%)   | 6 (2%)    | 6 (3%)    | 2 (4%)*   | 8 (10%)*  | 35 (3%)   |
| <b>Modality of active anti-cancer therapy<sup>b,c</sup></b> |           |           |           |           |           |           |
| None                                                        | 333 (45%) | 127 (44%) | 53 (23%)  | 20 (44%)  | 30 (38%)  | 563 (41%) |
| Chemotherapy                                                | 117 (16%) | 68 (24%)  | 88 (37%)  | 11 (24%)  | 14 (18%)  | 298 (22%) |
| Targeted Therapy                                            | 112 (15%) | 38 (13%)  | 59 (25%)  | 8 (18%)   | 11 (14%)  | 228 (16%) |
| <i>Anti-HER2 therapy</i>                                    | 60 (8%)   | 17 (6%)   | 36 (15%)  | <5 (<11%) | <5 (<6%)  | 123 (9%)  |
| <i>CDK4/6 inhibitor</i>                                     | 33 (4%)   | 12 (4%)   | 14 (6%)   | <5 (<11%) | <5 (<6%)  | 65 (5%)   |
| <i>Other<sup>d</sup></i>                                    | 14 (2%)   | 5 (2%)    | <5 (<2%)  | <5 (<11%) | 0 (0%)    | 24 (2%)   |
| Endocrine Therapy                                           | 283 (38%) | 86 (30%)  | 91 (39%)  | 15 (33%)  | 26 (33%)  | 501 (36%) |
| Immunotherapy                                               | 12 (2%)   | 8 (3%)    | <5 (<2%)  | <5 (<11%) | <5 (<6%)  | 28 (2%)   |
| Local (Surgery/Radiation)                                   | 80 (11%)  | 37 (13%)  | 41 (17%)  | <5 (<11%) | 9 (12%)   | 172 (12%) |
| Other                                                       | 13 (2%)   | 3 (1%)    | 2 (1%)    | 0 (0%)    | 0 (0%)    | 18 (1%)   |
| Missing/unknown                                             | 12 (2%)   | 7 (2%)    | 5 (2%)    | 0 (0%)    | 5 (6%)    | 29 (2%)   |
| <b>Severity of COVID-19</b>                                 |           |           |           |           |           |           |
| Mild                                                        | 535 (73%) | 177 (61%) | 173 (74%) | 28 (62%)  | 50 (64%)  | 963 (70%) |
| Moderate                                                    | 174 (24%) | 97 (34%)  | 56 (24%)  | 14 (31%)  | 21 (27%)  | 362 (26%) |
| Severe                                                      | 25 (3%)   | 15 (5%)   | 6 (3%)    | X*        | 7 (9%)    | 56 (4%)   |
| Missing/unknown                                             | 2 (<1%)   | 0 (0%)    | 0 (0%)    | 3 (7%)*   | 0 (0%)    | 2 (<1%)   |

|                                                                                                         |
|---------------------------------------------------------------------------------------------------------|
| <b>*Cells combined to mask N&lt;5 according to CCC19 low count policy</b>                               |
| <sup>a</sup> Age was truncated at 90                                                                    |
| <sup>b</sup> Percentages could sum to >100% because categories are not mutually exclusive               |
| <sup>c</sup> Within 3 months of COVID-19 diagnosis.                                                     |
| <sup>d</sup> Therapies other than Anti-Her2 therapy or CDK4/6 inhibitor                                 |
| Variable categories with one to five cases are masked by replacing with N < 5 according to CCC19 policy |

508

509

510

511

512

513

514

515

516

517

518

519

520

521

522

523

524

525

**Table II: Outcomes, Clinical Complications, and COVID-19 Interventions**

|                                                 | NHW<br>n <sup>a</sup> (%) | Black<br>n <sup>a</sup> (%) | Hispanic<br>n <sup>a</sup> (%) | AAPI<br>n <sup>a</sup> (%) | Other<br>n <sup>a</sup> (%) | All<br>n <sup>a</sup> (%) |
|-------------------------------------------------|---------------------------|-----------------------------|--------------------------------|----------------------------|-----------------------------|---------------------------|
| <b>Outcomes</b>                                 |                           |                             |                                |                            |                             |                           |
| Total all-cause mortality <sup>b</sup>          | 60 (8)                    | 38 (13)                     | 12 (5)                         | <5 (<11)                   | 9 (12)                      | 123 (9)                   |
| 30-day all-cause mortality <sup>c</sup>         | 40 (5)                    | 29 (10)                     | 8 (3)                          | <5 (<11)                   | 8 (10)                      | 89 (6)                    |
| Received mechanical ventilation <sup>b</sup>    | 24 (3)                    | 26 (9)                      | 11 (5)                         | <5 (<11)                   | <5 (<6)                     | 69 (5)                    |
| Admitted to an intensive care unit <sup>b</sup> | 45 (6)                    | 31 (11)                     | 18 (8)                         | 7 (16)                     | 10 (13)                     | 111 (8)                   |
| Admitted to the hospital <sup>b</sup>           | 245 (33)                  | 137 (47)                    | 77 (33)                        | 20 (44)                    | 33 (42)                     | 512 (37)                  |
| <b>Clinical complications</b>                   |                           |                             |                                |                            |                             |                           |
| Any cardiovascular complication <sup>d</sup>    | 82 (11)                   | 50 (17)                     | 30 (13)                        | 6 (13)                     | 18 (23)                     | 186 (14)                  |
| Any pulmonary complication <sup>e</sup>         | 170 (23)                  | 88 (31)                     | 43 (18)                        | 12 (27)                    | 23 (30)                     | 336 (24)                  |
| Any gastrointestinal complication <sup>f</sup>  | 12 (2)                    | 7 (2)                       | <5 (<2)                        | <5 (<11)                   | <5 (<7)                     | 26 (2)                    |
| Acute kidney injury                             | 41 (6)                    | 46 (16)                     | 11 (5)                         | 5 (11)                     | 10 (13)                     | 113 (8)                   |
| Multisystem organ failure                       | 10 (1)                    | 12 (4)                      | <5 (<2)                        | <5 (<11)                   | <5 (<7)                     | 29 (2)                    |
| Superimposed infection                          | 62 (9)                    | 42 (15)                     | 14 (6)                         | 7 (16)                     | <5 (<7)                     | 129 (10)                  |
| Sepsis                                          | 43 (6)                    | 24 (8)                      | 15 (6)                         | 7 (16)                     | 12 (16)                     | 101 (7)                   |
| Any bleeding                                    | 15 (2)                    | 7 (2)                       | <5 (<2)                        | <5 (<11)                   | <5 (<7)                     | 29 (2)                    |
| <b>Interventions</b>                            |                           |                             |                                |                            |                             |                           |
| Remdesivir                                      | 68 (10)                   | 20 (7)                      | 15 (7)                         | 8 (18)                     | 5 (7)                       | 116 (9)                   |
| Hydroxychloroquine                              | 60 (9)                    | 41 (15)                     | 14 (6)                         | <5 (<11)                   | 11 (15)                     | 129 (10)                  |
| Systemic Corticosteroids                        | 107 (15)                  | 50 (18)                     | 31 (14)                        | 8 (18)                     | 13 (18)                     | 209 (16)                  |
| Other                                           | 112 (16)                  | 53 (19)                     | 36 (16)                        | 11 (25)                    | 12 (17)                     | 224 (17)                  |
| Supplemental oxygen                             | 173 (24)                  | 87 (31)                     | 43 (19)                        | 14 (31)                    | 24 (31)                     | 341 (25)                  |

Variable categories with one to five cases are masked by replacing with N < 5 according to CCC19 policy

<sup>a</sup> N based on number of patients with non-missing data.

<sup>b</sup> Included in primary outcome

<sup>c</sup> Secondary outcome

<sup>d</sup> Cardiovascular complication includes hypotension, myocardial infarction, other cardiac ischemia, atrial fibrillation, ventricular fibrillation, other cardiac arrhythmia, cardiomyopathy, congestive heart failure, pulmonary embolism (PE), deep vein thrombosis (DVT), stroke, thrombosis NOS complication.

<sup>e</sup> Pulmonary complication includes respiratory failure, pneumonitis, pneumonia, acute respiratory distress syndrome (ARDS), PE, pleural effusion, empyema.

<sup>f</sup> Gastrointestinal complication includes acute hepatic injury, ascites, bowel obstruction, bowel perforation, ileus, peritonitis

526

527

528

529

**Table III: Systemic Treatments Received within 3 months prior to COVID-19 Diagnosis**

|                                                 | <b>N (%)</b>      |
|-------------------------------------------------|-------------------|
| <b>Total</b>                                    | <b>679 (100%)</b> |
| Endocrine therapy alone                         | 336 (49.5)        |
| CDK4/6 inhibitor +/- Endocrine therapy          | 63 (9)            |
| Other targeted therapy +/- Endocrine therapy    | 10 (1.5)          |
| Anti-HER2 therapy +/- Endocrine therapy         | 78 (11.5)         |
| Anti-HER2 therapy + Chemotherapy                | 48 (7)            |
| Single agent chemotherapy +/- Endocrine therapy | 55 (8)            |
| Combination chemotherapy +/- Endocrine therapy  | 60 (9)            |
| Immunotherapy +/- Chemotherapy                  | 19 (3)            |
| Other combination therapies                     | 10 (1.5)          |

530  
531  
532  
533  
534  
535  
536  
537  
538  
539  
540  
541  
542  
543  
544  
545  
546  
547  
548  
549  
550  
551  
552  
553  
554  
555  
556  
557  
558  
559  
560



**Table IV: Adjusted Associations of Baseline Characteristics with COVID-19 Severity Outcome.**

|                                                             | COVID-19 severity<br>OR (95% CI) |
|-------------------------------------------------------------|----------------------------------|
| <b>Age (per decade)</b>                                     | <b>1.48 (1.32- 1.67)</b>         |
| <b>Race (Ref: Non-Hispanic White)<sup>a</sup></b>           |                                  |
| Non-Hispanic Black                                          | <b>1.74 (1.24- 2.45)</b>         |
| Hispanic                                                    | 1.38 (0.93- 2.05)                |
| Non-Hispanic AAPI                                           | <b>3.40 (1.70- 6.79)</b>         |
| Other                                                       | <b>2.97 (1.71- 5.17)</b>         |
| <b>Obesity (Ref: No)</b>                                    | 1.20 (0.92- 1.57)                |
| <b>Cardiovascular Comorbidity (Ref: No)</b>                 | <b>2.26 (1.63- 3.15)</b>         |
| <b>Pulmonary Comorbidity (Ref: No)</b>                      | <b>1.65 (1.20- 2.29)</b>         |
| <b>Renal Disease (Ref: No)</b>                              | 1.34 (0.86- 2.07)                |
| <b>Diabetes Mellitus (Ref: No)</b>                          | <b>2.25 (1.66- 3.04)</b>         |
| <b>ECOG Performance Status (Ref: 0)</b>                     |                                  |
| 1                                                           | <b>1.74 (1.22- 2.48)</b>         |
| 2+                                                          | <b>7.78 (4.83-12.5)</b>          |
| Unknown                                                     | <b>2.26 (1.61- 3.19)</b>         |
| <b>Cancer Status (Ref: Remission/NED, &gt;5 years)</b>      |                                  |
| Remission or NED, <5 years                                  | 0.91 (0.63- 1.33)                |
| Active and responding                                       | 1.07 (0.63- 1.83)                |
| Active and stable                                           | 1.37 (0.82- 2.28)                |
| Active and progressing                                      | <b>12.5 (6.89-22.6)</b>          |
| Unknown                                                     | 1.79 (0.96- 3.34)                |
| <b>Chemotherapy (Ref: No)</b>                               | 1.37 (0.91- 2.06)                |
| <b>Anti-HER2 Therapy (Ref: No)</b>                          | 1.13 (0.67- 1.92)                |
| <b>CDK 4/6 inhibitor (Ref: No)</b>                          | 1.21 (0.60- 2.42)                |
| <b>Other Targeted Therapies<sup>b</sup> (Ref: No)</b>       | 1.78 (0.69- 4.59)                |
| <b>Endocrine Therapy (Ref: No)</b>                          | 1.00 (0.73- 1.37)                |
| <b>Locoregional Therapy (Ref: No)</b>                       | 1.36 (0.88- 2.10)                |
| <b>Never received cancer treatment (Ref: &gt;3 month)</b>   | 0.65 (0.28- 1.49)                |
| <b>Month/Year of COVID-19 Diagnosis (Ref: Jan-Apr 2020)</b> |                                  |
| May-Aug 2020                                                | 0.57 (0.41- 0.81)                |
| Sept-Dec 2020                                               | 0.45 (0.30- 0.68)                |
| Jan-Jun 2021                                                | 0.57 (0.36- 0.89)                |
| <b>Region (Ref: Northeast)</b>                              |                                  |

|         |                   |
|---------|-------------------|
| Midwest | 0.76 (0.54- 1.05) |
| South   | 0.76 (0.51- 1.13) |
| West    | 0.43 (0.29- 0.65) |

<sup>a</sup> Odds ratios greater than 1 indicate higher odds of composite outcome. The P value for evaluating the null hypothesis of equality in odds ratios across race (4 degrees of freedom) was <0.001.

<sup>b</sup> Therapies other than CDK4/6 inhibitor or Anti- HER2 therapy

All variance inflation factors are <1.8 for the model

561  
562  
563  
564  
565  
566  
567  
568  
569  
570  
571  
572

Figure I: Consort Flow Diagram

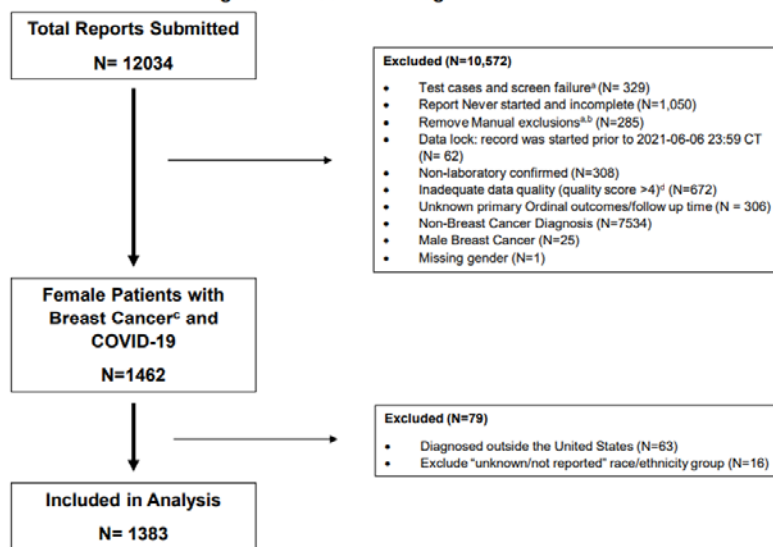

<sup>a</sup> Some Non-melanoma skin cancer, in situ cancers, premalignant conditions are excluded in this step.

<sup>b</sup> Manual exclusions = Duplicate records; In situ solid malignancy; Precursor hematologic condition; Benign hematologic condition; False positive SARS-CoV-2 test; Non-melanoma skin cancer; Non-invasive cancer; Low-quality score; Non-CCC29 site.

<sup>c</sup> Breast cancer defined as active or previous history of single primary breast cancer. Multiple primary cancers or bilateral breast cancer with exception of DCIS in the contralateral breast cancer were excluded.

<sup>d</sup> Data quality problems were classified as minor (1 point), moderate (3 points), and major (5 points) and reports with quality scores > 4 using previously defined metrics were excluded

573

574 **Supplementary Appendix**

575 TABLE OF CONTENTS

576

|     |                                                                                 |                     |
|-----|---------------------------------------------------------------------------------|---------------------|
| 577 | <b>APPENDIX A: CCC-19 Quality Scores</b>                                        | <b>Page: 6</b>      |
| 578 |                                                                                 |                     |
| 579 | <b>APPENDIX B: Breast Cancer Disparities Statistical Analysis Plan:</b>         | <b>Pages: 7-13</b>  |
| 580 |                                                                                 |                     |
| 581 | <b>APPENDIX C: CCC19 Approved Project Variables</b>                             | <b>Pages:14-20</b>  |
| 582 |                                                                                 |                     |
| 583 | <b>APPENDIX D: Supplementary Figure I - Proportional Odds Assumption</b>        | <b>Page:21</b>      |
| 584 |                                                                                 |                     |
| 585 | <b>APPENDIX E: Suppl Table I – Unadjusted rates of outcomes after</b>           |                     |
| 586 | <b>COVID-19 diagnosis by cancer status</b>                                      | <b>Page:22</b>      |
| 587 |                                                                                 |                     |
| 588 | <b>APPENDIX F: Suppl Table IIA and IIB: Baseline Characteristics of Females</b> |                     |
| 589 | <b>with MBC and unadjusted rates of outcomes after COVID-19 diagnosis</b>       | <b>Pages: 23-26</b> |
| 590 |                                                                                 |                     |
| 591 | <b>APPENDIX G: Suppl Table III: Sensitivity Analysis by Race/Ethnicity</b>      | <b>Page: 27</b>     |
| 592 |                                                                                 |                     |
| 593 | <b>APPENDIX H: Suppl Table IVA &amp; IVB - Male Breast Cancer</b>               | <b>Pages: 28-30</b> |
| 594 |                                                                                 |                     |
| 595 | <b>APPENDIX I: List of Participants by Institution</b>                          | <b>Pages: 31-34</b> |

596

597

598

599

600

601

602

603

604

605

606

607 **APPENDIX A: CCC-19 Quality Scores**

608

609 The CCC-19 uses a quality scoring system to determine the suitability of records for inclusion in analyses. A score greater  
610 than 5 was considered insufficient for inclusion in the analysis presented. Scores are tabulated as follows:

611

**Minor problems (+1 points per problem)**

ADT missing/unknown (prostate cancers only)  
Biomarkers missing/unknown (breast cancers only)  
ICU admission missing/unknown  
Hospitalization missing/unknown  
Mechanical ventilation missing/unknown  
O2 ever needed missing/unknown  
Days to death missing/unknown  
Cancer status unknown  
ECOG PS unknown  
Missing cancer drug names for patients on systemic anti-cancer treatment  
Missing or unknown categorical lab values if labs were drawn

**Moderate problems (+3 points per problem)**

Cancer status missing  
ECOG PS missing  
Death status missing/unknown  
Baseline COVID-19 severity missing/unknown  
Should have 30-day follow-up but doesn't

**Major problems (+5 points per problem)**

High levels of missingness  
High levels of unknowns

612

613

614

615

616

617

618

619

620

621

622

623

624

625

626 **APPENDIX B: Breast Cancer Disparities Statistical Analysis Plan:**

627

628 Approved Project Title: **Racial and Ethnic Disparities among Patients with Breast Cancer and COVID-19 in CCC19**  
629 **Cohort**

630

631

632 Project Team Leads: Gayathri Nagaraj, Melissa Accordino, Maryam Lustberg, Dimpy Shah

633

634 Name of the investigator completing this survey: Gayathri Nagaraj and Melissa Accordino

635

636 Proposed milestone deadline for this manuscript:

637 • Abstract submission for ASCO 2021, deadline February 17 completed.

638 • ASCO abstract accepted for oral presentation. Deadlines for prelim slide upload May 7, and final deadline for  
639 uploading slides May 14.

640 • Manuscript preparation simultaneously, deadline and journal TBD

641 Do you have local statistical support: No

642

643 Name and emails of (at most) 2 additional project team members who would like to be part of the analysis team for the  
644 project:

645 Melissa Accordino, Email: [mkg2134@cumc.columbia.edu](mailto:mkg2134@cumc.columbia.edu)

646 Maryam Lustberg, Email: [Maryam.Lustberg@osumc.edu](mailto:Maryam.Lustberg@osumc.edu)

647 Dimpy Shah, Email: [shahdp@uthscsa.edu](mailto:shahdp@uthscsa.edu)

648

649 Initial draft of the Statistical Analysis Plan (SAP), following STROBE guidelines, for our review and input. Please complete  
650 sections 1 and 3-11 (and 12 if you have local statistical support)

651

652 **1 (a) Manuscript Title:** **Racial and Ethnic Disparities among Patients with Breast Cancer and COVID-19 in CCC19**  
653 **Cohort**

654

655 **1 (b) Provide in the abstract an informative and balanced summary of what was done and what will be found.**

656

657 Racial and Ethnic minority subgroups are at a disproportionately increased risk of contracting COVID-19 or experiencing  
658 severe illness regardless of age. Racial and Ethnic disparities also affect breast cancer incidence and mortality. The impact of  
659 COVID-19 on patients with breast cancer is largely unknown but is currently under investigation. Outcomes of COVID-19  
660 specifically in racial and ethnic minority patients with active or prior history of breast cancer is currently unknown.

661 **3. Objectives**

662 State specific objectives, including any prespecified hypotheses:

663

664 **The overarching goal** of this study is to evaluate the racial and ethnic disparities related to COVID-19 outcomes, in patients  
665 with active or previous history of breast cancer. To evaluate this, the following specific aims are proposed:

666

- 667 • **Specific Aim 1: To compare the distribution of major clinical, sociodemographic, and breast cancer risk**  
668 **factors among racial and ethnic subgroups of women with active or previous history of single primary**  
669 **invasive breast cancer diagnosed with COVID-19.**

670 We *hypothesize* that racial and ethnic minority women with breast cancer are more likely to have active comorbid  
671 conditions, such as diabetes mellitus, obesity, smoking history, and a baseline lower performance status compared to  
672 non-Hispanic white (NHW) women with active or previous history of breast cancer diagnosed with COVID-19.  
673 Other variables of interest are age, month/year of COVID-19 diagnosis, area of patient residence, geographic region,  
674 insurance type, treatment center characteristics, receipt of anti-COVID-19 treatment along with tumor characteristics  
675 including breast cancer biologic subtype, cancer status, treatment intent, timing of anti-cancer treatment and  
676 modality of anti-cancer treatment.

677

- 678 • **Specific Aim 2: To compare COVID-19 clinical outcomes on a five-level ordinal scale based on patient's most**  
679 **severe reported outcomes: no complications (uncomplicated); hospital admission, intensive care unit (ICU)**  
680 **admission, mechanical ventilation; or death from any cause in racial and ethnic minority subgroups of**  
681 **women with previous or active history of breast cancer compared to NHW adjusted for baseline**  
682 **characteristics. We also plan to evaluate the death within 30 days of COVID-19 diagnosis among racial and**  
683 **ethnic subgroups of women with previous or active history of breast cancer compared to NHW adjusted for**  
684 **baseline characteristics.**

685 We *hypothesize* that there will be higher rates of severe COVID-19 related outcomes in the racial and ethnic  
686 minority subgroups compared to non-Hispanic white (NHW) patients with active or previous history of breast  
687 cancer.

688

- 689 • **Exploratory aims:**

690

- 691 1. To evaluate the frequency of hospitalization, supplemental oxygen use, ICU admission and use of  
692 mechanical ventilation in the various racial ethnic groups.  
693 2. To describe the distribution of major clinical, sociodemographic, breast cancer risk factors and outcomes in  
694 men with active or previous history of breast cancer diagnosed with COVID-19.  
695 3. Assess the rate of major clinical complications such as cardiovascular, pulmonary, gastrointestinal,  
696 superimposed infection, vascular thrombosis and others among various racial and ethnic groups of women  
697 with active or previous history of breast cancer.

698

699 **4. Study Design**

700 Study Design:

701 Present key elements of study design early in the paper

702 This is a retrospective cohort study using de-identified data from the COVID-19 and Cancer Consortium (CCC19) database  
703 which is a centralized multi-institution registry of patients with current or past history of cancer diagnosed with COVID-19.  
704 Study data are collected and managed using REDCap software hosted at Vanderbilt University Medical Center.

705

706

707 **5. Setting**

708 **Setting**

709 Describe the setting, locations, and relevant dates, including periods of recruitment, exposure, follow-up, and data collection.

710 The CCC19 international registry consists of de-identified data on adult patients (18 years and older) with a current or past  
711 history of hematologic malignancy or invasive solid tumor who either have laboratory-confirmed SARS-CoV-2 infection or  
712 presumptive diagnosis of COVID-19. The CCC19 registry includes patients with either active cancer or a history of cancer  
713 and contains variables related to patient demographics, cancer history, and COVID-19 clinical course including receipt of  
714 COVID-19 related therapeutics along with follow-up data. The member institutions of the consortium report data through the  
715 online REDCap data collection survey developed by CCC19. Data collection period is ongoing, for the purpose of this  
716 analysis, the data collected from March 17, 2020 to February 9 2021 will be used.

717 **6. Participants**

718 (a) Give the eligibility criteria, and the sources and methods of selection of participants. Describe methods of follow-up:

719

720 Patients with active or previous history of invasive breast cancer with evaluable self-reported race/ethnicity data, and with  
721 laboratory confirmed COVID-19 will be our study population. While the primary analysis will be restricted to women with  
722 active or previous history of breast cancer and descriptive data on men with active or previous history of breast cancer will be  
723 provided separately as part of the exploratory analysis given the small numbers. We will restrict our analysis to patients  
724 diagnosed in the United States of America since the racial and ethnic disparities of interest have been previously described in  
725 United States. We will also exclude patients who have multiple malignancies including a history of bilateral breast cancer  
726 with the exception of contralateral DCIS only. Further, patients who are not evaluable for the primary ordinal outcome or  
727 with a data quality score >4 will be excluded. For this analysis, the unknown/Not reported category of race and ethnicity will  
728 be excluded.

729

730

731

732

733

734

735

736

737

738

739

740

741

742

743  
744  
745  
746  
747  
748  
749  
750  
751  
752  
753  
754  
755  
756  
757  
758  
759  
760  
761  
762  
763  
764  
765  
766  
767  
768  
769  
770  
771  
772  
773  
774

CONSORT flow diagram

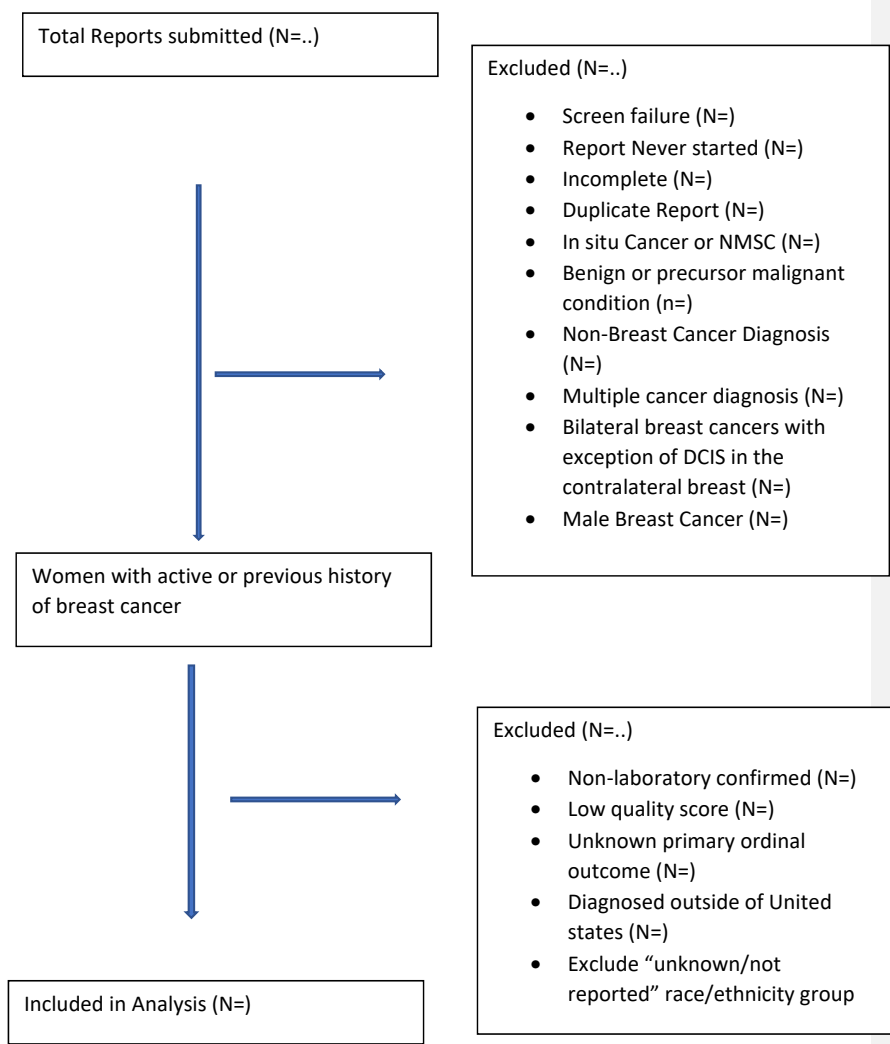



775 (b) For matched studies, give matching criteria and number of exposed and unexposed:

776

777 Not applicable as the CCC19 registry does not carry data for cancer patients who are not exposed to Covid-19.

778

779 **7. Variables (Clearly define all variables)**

780 **Outcomes:**

- 781 • Primary: COVID-19 severity outcome defined on a five-level ordinal scale based on patient's most severe reported
- 782 outcomes: No complications (uncomplicated); hospital admission; intensive care unit admission, mechanical
- 783 ventilation; or death from any cause.
- 784 • Secondary: 30-day all-cause mortality
- 785 • Exploratory/Descriptive:
- 786 ○ Rates of hospitalization; oxygen requirements; ICU admission; mechanical ventilation.
- 787 ○ Major clinical complications (cardiovascular, pulmonary, gastrointestinal, AKI, MOF, superimposed
- 788 infection, sepsis, any bleeding, DIC, Thrombosis).
- 789 ○ Descriptive statistics for men with breast cancer diagnosed with COVID-19.

790

791 **Exposures**

792 **Predictors**

- 793 1) Self-reported race
- 794 2) Self-reported ethnicity

795 **Potential confounders**

796 **Higher priority**

- 797 1) Age in years
- 798 2) Obesity (obese, not obese)
- 799 3) Co-morbidities (pulmonary, cardiovascular, renal, diabetes mellitus)
- 800 4) ECOG PS (0, 1,  $\geq 2$ , unknown)
- 801 5) Receptor status (Hormone receptor positive, HER2 positive, dual positive, Triple negative)
- 802 6) Cancer status (remission < 5 years, remission > 5 years, active stable, active responding, active progressing,
- 803 unknown)
- 804 7) Timing of anti-cancer treatment (never treated, 0-4 weeks, 1-3 months, >3 months)
- 805 8) Modality of recent anti-cancer treatment (none, cytotoxic chemotherapy, targeted therapy, endocrine therapy,
- 806 immunotherapy, locoregional therapy, other)
- 807 9) Period of COVID-19 diagnosis (Jan-April 2020, May-August 2020, Sep-Nov 2020, Dec 2020-Feb 2021)

808

809 **Lower priority**

- 810 10) Smoking (ever, never)
- 811 11) US region of patient residence (NE, MW, South, West)
- 812 12) Area of patient residence (urban, suburban, rural)
- 813 13) Insurance status (Not insured, private insurance, Medicaid/Medicare, other government, missing/unknown)
- 814 14) Treatment center characteristics academic (university, tertiary and NCI designated comprehensive cancer centers),
- 815 community (practice and hospital), other.

816

817

818 **Effect modifiers**

819 **None**

820 Diagnostic criteria (if applicable)

#### 821 8. Data Sources / Measurement

822 For each variable of interest, give sources of data and details of methods of assessment (measurement). Describe  
823 comparability of assessment methods if there is more than one group.

824

#### 825 9. Bias

826 Describe any efforts to address potential sources of bias

827 Multivariable regression models will be used to adjust for known confounding variables.

828

#### 829 10. Study size

830 Explain how the study size was arrived at

831 Study size is based on the number of breast cancer cases reported in the registry at the time of Analysis. Breast cancer is the  
832 single largest solid tumor cohort within the CCC19 registry accounting for roughly 21% of cases. The numbers are expected  
833 to rise given the steep accrual rate.

834

#### 835 11. Quantitative variables

836 Explain how quantitative variables will be handled in the analyses. If applicable, describe which groupings will be chosen  
837 and why

838

#### 839 12. Statistical methods

840 (a) Describe all statistical methods, including those to be used to control for confounding

841

842 *Primary analysis among women:*

843 Standard descriptive statistics will summarize major clinical, demographic, and breast cancer prognostic factors; clinical  
844 complications during hospitalization; and rates of 30-day mortality, hospitalization, oxygen requirement, ICU admission, and  
845 mechanical ventilation among racial and ethnic subgroups. Multivariable ordinal and binary logistic regression models will  
846 estimate differences in adjusted odds of COVID-19 severity and 30-day mortality, respectively, between racial and ethnic  
847 subgroups. Because the ordinal outcome is assessed over patient's total follow-up period, the model will include an offset for  
848 (log) follow-up time. Adjustment covariates will be selected first from the "higher priority" confounders listed above,  
849 followed by those listed as "lower priority." Coefficients and standard errors from models with different levels of adjustment,  
850 variance inflation factors, and clinical judgement will be used to assess model stability.

851

852 *Descriptive analysis among men:*

853 We will calculate standard descriptive statistics for major clinical, demographic, and breast cancer prognostic factors and  
854 clinical complications during hospitalization; rates of 30-day mortality, hospitalization, oxygen requirement, ICU admission,  
855 and mechanical ventilation among men with active or previous history of breast cancer.

856

857  
858 (b) Describe any methods that will be used to examine subgroups and interactions

859 None included.

860

861 (c) Explain how missing data will be addressed

862 Multiple imputation will be used to impute missing and unknown data for all variables included in the analysis, with some  
863 exceptions: unknown ECOG performance score and unknown cancer status will not be imputed and treated as a separate  
864 category in analyses. Imputation will be performed on the largest dataset possible (that is, after removing test cases and other  
865 manual exclusions, but before applying specific exclusion criteria). At least 10 imputed datasets will be used.

866

867 (d) If applicable, explain how loss to follow-up will be addressed

868 All observed outcomes will be used with models adjusted for duration of follow-up.

869

870 (e) Describe any sensitivity analyses

871 None.

872

873

874

875

876

877

878

879

880

881

882

883

884

885

886

887

888

889

890

891

892

893

894 **APPENDIX C: CCC19 Approved Project Variables**

895 *Primary Outcome (Table III)*

| Outcome description                                   | Outcome variable name  | Outcome values                                                                                     |
|-------------------------------------------------------|------------------------|----------------------------------------------------------------------------------------------------|
| Custom ordinal outcome with death at any time         | <i>der_ordinal_v1a</i> | 0 = not hospitalized; 1 = hospitalized; 2 = ICU; 3 = mechanical ventilation; 4 = death at any time |
| Follow-up in days, with some estimation for intervals | <i>der_days_fu</i>     | Integer (days)                                                                                     |

896

897 *Secondary Outcome (Table II)*

| Outcome description                                                                                      | Outcome variable name                                                           | Outcome values                | Additional Details                                                                                                                                                                                                                                                                                                                                                                                                                                                                                                                                                                                                                                                   |
|----------------------------------------------------------------------------------------------------------|---------------------------------------------------------------------------------|-------------------------------|----------------------------------------------------------------------------------------------------------------------------------------------------------------------------------------------------------------------------------------------------------------------------------------------------------------------------------------------------------------------------------------------------------------------------------------------------------------------------------------------------------------------------------------------------------------------------------------------------------------------------------------------------------------------|
| Derived dead/alive variable                                                                              | <i>der_deadbinary</i>                                                           | 0 = No; 1 = Yes; 99 = Unknown |                                                                                                                                                                                                                                                                                                                                                                                                                                                                                                                                                                                                                                                                      |
| Derived variable indicating whether patient has died within 30 days of COVID-19 diagnosis (default = No) | <i>der_dead30</i>                                                               | 0 = No; 1 = Yes; 99 = Unknown |                                                                                                                                                                                                                                                                                                                                                                                                                                                                                                                                                                                                                                                                      |
| Derived variable indicating whether patients required mechanical ventilation                             | <i>der_mv</i>                                                                   | 0 = No; 1 = Yes; 99 = Unknown |                                                                                                                                                                                                                                                                                                                                                                                                                                                                                                                                                                                                                                                                      |
| Derived variable indicating time in ICU                                                                  | <i>der_ICU</i>                                                                  | 0 = No; 1 = Yes; 99 = Unknown |                                                                                                                                                                                                                                                                                                                                                                                                                                                                                                                                                                                                                                                                      |
| Derived hospitalized/not hospitalized variable                                                           | <i>der_hosp</i>                                                                 | 0 = No; 1 = Yes; 99 = Unknown |                                                                                                                                                                                                                                                                                                                                                                                                                                                                                                                                                                                                                                                                      |
| Derived cardiovascular complication variable (see additional details)                                    | <i>der_CV_event_v2</i><br>( <i>der_any_CV</i> is the variable name in R script) | 0 = No; 1 = Yes; 99=Unknown.  | <p>Derived with the following derived variables:</p> <ul style="list-style-type: none"> <li><i>der_hotn_comp</i>,</li> <li><i>der_MI_comp</i>,</li> <li><i>der_card_isch_comp</i>,</li> <li><i>der_AFib_comp</i>,</li> <li><i>der_VF_comp</i>,</li> <li><i>der_arry_oth_comp</i>,</li> <li><i>der_CMY_comp</i>,</li> <li><i>der_CHF_comp</i>,</li> <li><i>der_PE_comp</i>,</li> <li><i>der_DVT_comp</i>,</li> <li><i>der_stroke_comp</i>,</li> <li><i>der_thrombosis_NOS_comp</i></li> </ul> <p>Coded as 1 if any of these variables is 1; coded as 0 if all these variables are 0; coded as 99 if any of variables is 99 and <i>der_CV_event_v2</i> is missing;</p> |

|                                                                                |                                                                   |                               |                                                                                                                                                                                                                                                                                                                                                                                                                                                          |
|--------------------------------------------------------------------------------|-------------------------------------------------------------------|-------------------------------|----------------------------------------------------------------------------------------------------------------------------------------------------------------------------------------------------------------------------------------------------------------------------------------------------------------------------------------------------------------------------------------------------------------------------------------------------------|
|                                                                                |                                                                   |                               | otherwise, NA<br><br>For all listed variable here:<br>0=No, 1=Yes, 99=Unknown                                                                                                                                                                                                                                                                                                                                                                            |
| <b>Derived pulmonary complication variable (see additional details)</b>        | der_pulm_event<br>(der_any_Pulm is the variable name in R script) | 0 = No; 1 = Yes; 99=Unknown.  | Derived with the following derived variables:<br><br>der_resp_failure_comp,<br>der_pneumonitis_comp,<br>der_pneumonia_comp,<br>der_ARDS_comp,<br>der_PE_comp,<br>der_pleural_eff_comp,<br>der_empyema_comp<br><br>Coded as 1 if any of these variables is 1; coded as 0 if all these variables are 0; coded as 99 if any of variables is 99 and der_pulm_event is missing; otherwise, NA<br><br>For all listed variable here:<br>0=No, 1=Yes, 99=Unknown |
| <b>Derived gastrointestinal complication variable (see additional details)</b> | der_GI_event<br>(der_any_Gast is the variable name in R script)   | 0 = No; 1 = Yes; 99=Unknown.  | Derived with the following derived variables:<br><br>der_AHI_comp,<br>der_ascites_comp,<br>der_BO_comp,<br>der_bowelPerf_comp,<br>der_ileus_comp,<br>der_peritonitis_comp<br><br>Coded as 1 if any of these variables is 1; coded as 0 if all these variables are 0; coded as 99 if any of variables is 99 and der_GI_event is missing; otherwise, NA<br><br>For all listed variable here:<br>0=No, 1=Yes, 99=Unknown                                    |
| <b>Acute kidney injury (checkbox only)</b>                                     | der_AKI_comp                                                      | 0 = No; 1 = Yes; 99 = Unknown |                                                                                                                                                                                                                                                                                                                                                                                                                                                          |
| <b>Multisystem organ failure</b>                                               | der_MOF_comp                                                      | 0 = No; 1 = Yes; 99 = Unknown |                                                                                                                                                                                                                                                                                                                                                                                                                                                          |
| <b>Any co-infection within +/- 2 weeks of COVID-19 dx</b>                      | der_coinfection_any                                               | 0 = No; 1 = Yes; 99 = Unknown |                                                                                                                                                                                                                                                                                                                                                                                                                                                          |
| <b>Sepsis</b>                                                                  | der_sepsis_comp                                                   | 0 = No; 1 = Yes; 99 = Unknown |                                                                                                                                                                                                                                                                                                                                                                                                                                                          |
| <b>Bleeding</b>                                                                | der_bleeding_comp                                                 | 0 = No; 1 = Yes; 99 = Unknown |                                                                                                                                                                                                                                                                                                                                                                                                                                                          |
| <b>DIC (without modifier of</b>                                                | der_DIC_comp                                                      | 0 = No; 1 = Yes; 99 =         |                                                                                                                                                                                                                                                                                                                                                                                                                                                          |

|                                                          |                     |                               |  |
|----------------------------------------------------------|---------------------|-------------------------------|--|
| definite/probable/possible)                              |                     | Unknown                       |  |
| Remdesivir as treatment for COVID-19 ever                | der_rem             | 0 = No; 1 = Yes; 99 = Unknown |  |
| Hydroxychloroquine as COVID-19 treatment ever            | der_hcq             | 0 = No; 1 = Yes; 99 = Unknown |  |
| Steroids as COVID-19 treatment ever                      | der_steroids_c19    | 0 = No; 1 = Yes; 99 = Unknown |  |
| COVID-19 treatments other than HCQ, steroids, remdesivir | der_other_tx_c19_v2 | 0 = No; 1 = Yes; 99 = Unknown |  |
| Indicates whether patient has ever had supplemental o2   | der_o2_ever         | 0 = No; 1 = Yes; 99 = Unknown |  |

898  
899  
900

| Covariate description                                                                      | Variable name | Covariate values                                                                                                               | Additional Details |
|--------------------------------------------------------------------------------------------|---------------|--------------------------------------------------------------------------------------------------------------------------------|--------------------|
| Race/ethnicity including Asian                                                             | der_race_v2   | Hispanic; Non-Hispanic AAPI; Non-Hispanic Black; Non-Hispanic White; Other                                                     |                    |
| Age with imputation for categoricals                                                       | der_age_trunc | Years (continuous 18-89; patients noted to be greater than 89 are set to be age = 90)                                          |                    |
| Insurance type                                                                             | der_insurance | Medicaid alone; Medicare alone; Medicare/Medicaid +/- other; Other government +/- other; Private +/- other; Uninsured; Unknown |                    |
| Derived variable for smoking status collapsing the current/former smoker variables         | der_smoking2  | Never; Current or Former; Unknown                                                                                              |                    |
| Binary obesity (BMI $\geq$ 30 or checkbox checked) indicator                               | der_obesity   | 0 = No; 1 = Yes; 99 = Unknown                                                                                                  |                    |
| Cardiovascular comorbidity (CAD, CHF, Afib, arrhythmia NOS, PVD, CVA, cardiac disease NOS) | der_card      | 0 = No; 1 = Yes; 99 = Unknown                                                                                                  |                    |
| Derived variable indicating whether patient has pulmonary comorbidities                    | der_pulm      | 0 = No; 1 = Yes; 99 = Unknown                                                                                                  |                    |
| Renal comorbidities                                                                        | der_renal     | 0 = No; 1 = Yes; 99 =                                                                                                          |                    |

|                                                                                             |                         |                                                                                                                                         |                                                                                                                                                                                                                                                                                                               |
|---------------------------------------------------------------------------------------------|-------------------------|-----------------------------------------------------------------------------------------------------------------------------------------|---------------------------------------------------------------------------------------------------------------------------------------------------------------------------------------------------------------------------------------------------------------------------------------------------------------|
|                                                                                             |                         | Unknown                                                                                                                                 |                                                                                                                                                                                                                                                                                                               |
| <b>Derived variable indicating whether patient has diabetes mellitus</b>                    | der_dm2                 | 0 = No; 1 = Yes; 99 = Unknown                                                                                                           |                                                                                                                                                                                                                                                                                                               |
| <b>Performance Status</b>                                                                   | der_ecogcat2            | ECOG 0, 1, or 2+                                                                                                                        |                                                                                                                                                                                                                                                                                                               |
| <b>Breast biomarkers combined variable</b>                                                  | der_breast_biomarkers   | 1 = ER+; 2 = ER+/HER2+; 3 = HER2+; 4 = triple negative; 99 = Unknown                                                                    |                                                                                                                                                                                                                                                                                                               |
| <b>Derived variable indicating cancer status (Splits remission/NED by cancer timing)</b>    | der_cancer_status_v4    | 0 - Remission/NED, remote; 1 - Remission/NED, recent; 2 - Active, responding; 3 - Active, stable; 4 - Active, progressing; 99 - Unknown |                                                                                                                                                                                                                                                                                                               |
| <b>Timing of cancer treatment relative to COVID-19, collapsed</b>                           | der_cancer_tx_timing_v2 | 0 = more than 3 months; 1 = 0-4 weeks; 2 = 1-3 months (*); 88 = never or after COVID-19 diagnosis; 99 = unknown                         |                                                                                                                                                                                                                                                                                                               |
| <b>No cancer treatment in the 3 months prior to COVID-19</b>                                | der_cancertr_none       | 0=No; 1=Yes; 99=Unknown                                                                                                                 | Derived with the following covariates:<br><br>der_any_cyto,<br>der_any_targeted,<br>der_any_endo,<br>der_any_immuno,<br>der_any_local,<br>der_any_other<br><br>Coded as 1 if all these variables are 0; coded as 0 if any of these variables is 1; coded as 99 if any of these variables is 99; otherwise, NA |
| <b>Any cytotoxic cancer treatment in the 3 months prior to COVID-19</b>                     | der_any_cyto            | 0 = No; 1 = Yes; 99 = Unknown                                                                                                           |                                                                                                                                                                                                                                                                                                               |
| <b>Any targeted therapy in the 3 months prior to COVID-19</b>                               | der_any_targeted        | 0 = No; 1 = Yes; 99 = Unknown                                                                                                           |                                                                                                                                                                                                                                                                                                               |
| <b>Any targeted therapy includes an anti-HER2 therapy in the 3 months prior to COVID-19</b> | der_her2_3m             | 0 = No; 1 = Yes                                                                                                                         | Derived with der_her2, der_any_targeted.<br><br>Coded as 1 if der_any_targeted is 1 and der_her2 is 1<br><br>Coded as 0 if:<br>a. der_any_targeted is 1 and der_her2 is 0<br>b. der_any_targeted is 1<br><br>Otherwise, NA                                                                                    |

|                                                                                                               |                |                                                                             |                                                                                                                                                                                                                                                                                                                                                          |
|---------------------------------------------------------------------------------------------------------------|----------------|-----------------------------------------------------------------------------|----------------------------------------------------------------------------------------------------------------------------------------------------------------------------------------------------------------------------------------------------------------------------------------------------------------------------------------------------------|
|                                                                                                               |                |                                                                             | <p>der_her2:<br/>0 = No; 1 = Yes</p>                                                                                                                                                                                                                                                                                                                     |
| <p><b>Any targeted therapy includes a CDK4/6 inhibitor therapy in the 3 months prior to COVID-19</b></p>      | der_cdk46i_3m  | 0 = No; 1 = Yes                                                             | <p>Derived with der_cdk46i, der_any_targeted.</p> <p>Coded as 1 if der_any_targeted is 1 and der_cdk46i is 1</p> <p>Coded as 0 if:<br/>a. der_any_targeted is 1 and der_cdk46i is 0<br/>b. der_any_targeted is 1</p> <p>Otherwise, NA</p> <p>der_cdk46i:<br/>0 = No; 1 = Yes</p>                                                                         |
| <p><b>Any other targeted therapy (Not anti-HER2 / CDK4/6 inhibitor) in the 3 months prior to COVID-19</b></p> | der_other_3m   | 0 = No; 1 = Yes                                                             | <p>Derived with der_targeted_not_her2_cdk46i, der_any_targeted.</p> <p>Coded as 1 if der_any_targeted is 1 and der_targeted_not_her2_cdk46i is 1</p> <p>Coded as 0 if:<br/>a. der_any_targeted is 1 and der_targeted_not_her2_cdk46i is 0<br/>b. der_any_targeted is 1</p> <p>Otherwise, NA</p> <p>der_targeted_not_her2_cdk46i:<br/>0 = No; 1 = Yes</p> |
| <p><b>Any endocrine therapy in the 3 months prior to COVID-19</b></p>                                         | der_any_endo   | 0 = No; 1 = Yes; 99 = Unknown                                               |                                                                                                                                                                                                                                                                                                                                                          |
| <p><b>Any immunotherapy in the 3 months prior to COVID-19</b></p>                                             | der_any_immuno | 0 = No; 1 = Yes; 99 = Unknown                                               |                                                                                                                                                                                                                                                                                                                                                          |
| <p><b>Any local therapy (surgery or RT) within 3 months</b></p>                                               | der_any_local  | 0 = No; 1 = Yes; 99 = Unknown                                               |                                                                                                                                                                                                                                                                                                                                                          |
| <p><b>Any other cancer therapy in the 3 months prior to COVID-19</b></p>                                      | der_any_other  | 0 = No; 1 = Yes; 99 = Unknown                                               |                                                                                                                                                                                                                                                                                                                                                          |
| <p><b>Region of patient residence with ex-US collapsed</b></p>                                                | der_region_v2  | Non-US; Other; Undesignated US; US Midwest; US Northeast; US South; US West |                                                                                                                                                                                                                                                                                                                                                          |
| <p><b>Trimester and year of</b></p>                                                                           | der_tri_rt_dx  | T1 2020; T2 2020; T3                                                        |                                                                                                                                                                                                                                                                                                                                                          |



|                                                                                            |                                      |                                                                                                                                     |                                                                                                                                                                                                                                                                                                                                                                                                                                                                            |
|--------------------------------------------------------------------------------------------|--------------------------------------|-------------------------------------------------------------------------------------------------------------------------------------|----------------------------------------------------------------------------------------------------------------------------------------------------------------------------------------------------------------------------------------------------------------------------------------------------------------------------------------------------------------------------------------------------------------------------------------------------------------------------|
| <b>diagnosis, using the most recent side of the interval as anchor</b>                     |                                      | 2020; T1 2021                                                                                                                       |                                                                                                                                                                                                                                                                                                                                                                                                                                                                            |
| <b>What type of area does the patient primarily reside in?</b>                             | urban_rural <sup>1</sup>             | 1, Urban (city)   2, Suburban (town, suburbs)   3, Rural (country)   88, Other   99, Unknown                                        |                                                                                                                                                                                                                                                                                                                                                                                                                                                                            |
| <b>The type of health care center providing the patient's data</b>                         | der_site_type                        | AMC = academic medical center; CP = community practice; TCC = tertiary care center                                                  |                                                                                                                                                                                                                                                                                                                                                                                                                                                                            |
| <b>Initial Severity and Course of Illness</b>                                              | severity_of_covid_19_v2 <sup>1</sup> | 1, Mild (no hospitalization required)   2, Moderate (hospitalization indicated)   3, Severe (ICU admission indicated)   99, Unknown |                                                                                                                                                                                                                                                                                                                                                                                                                                                                            |
| <b>Derived treatment intent</b>                                                            | der_tr_intent                        | Unknown Treatment; Not on Treatment; Palliative; Curative; Missing<br><br>Unknown Treatment and Missing were collapsed for analysis | Derived with der_anytx and treatment_intent:<br><br>Coded as "Unknown Treatment" if der_anytx is NA or 99;<br><br>Coded as "Not on Treatment" if der_anytx is 0<br><br>Coded as "Palliative" if der_anytx is 1 and treatment_intent is 2<br><br>Coded as "Curative" if der_anytx is 1 and treatment_intent is 1<br><br>Otherwise, Missing<br><br>der_anytx:<br>0 = No; 1 = Yes; 99 = Unknown<br><br>Treatment_intent: 1, Curative   2, Palliative   99, Unclear or unknown |
| <b>Most recent line of cancer treatment, including systemic and non-systemic therapies</b> | der_txline                           | Untreated in last 12 months; Curative NOS; First line; Non-curative NOS; Other; Second line or greater; Unknown                     |                                                                                                                                                                                                                                                                                                                                                                                                                                                                            |
| <b>Hematologic malignancy indicator</b>                                                    | der_heme                             | 0 = No; 1 = Yes                                                                                                                     |                                                                                                                                                                                                                                                                                                                                                                                                                                                                            |

901

| Other covariate related to cohort selection for analysis | Variable name | Covariate values | Covariate description |
|----------------------------------------------------------|---------------|------------------|-----------------------|
| <b>Sex (Recode other/prefer not to</b>                   | der_sex       | Male, Female     |                       |

|                                                                                                                                                                                                                        |                            |                                    |  |
|------------------------------------------------------------------------------------------------------------------------------------------------------------------------------------------------------------------------|----------------------------|------------------------------------|--|
| say gender --> missing)                                                                                                                                                                                                |                            |                                    |  |
| Breast cancer                                                                                                                                                                                                          | der_Breast                 | 0 = No; 1 = Yes                    |  |
| Cancer type of second malignancy.<br><br>If the patient has more than two malignancies, please select the second-most recently diagnosed cancer type. If unknown or unclear, please specify in the free text box below | cancer_type_2 <sup>1</sup> | ** indicates no second malignancy. |  |
| Region of patient residence with US and ex-US collapsed                                                                                                                                                                | der_region_v3              | Non-US; Other; US                  |  |

902

903 New covariate request – 2-5-22

| New covariate          | Variable name   | Covariate values              | Covariate description                                               |
|------------------------|-----------------|-------------------------------|---------------------------------------------------------------------|
| MBC vs non-MBC         | der_metastatic  | 0 = No; 1 = Yes; 99 = Unknown | Metastatic cancer status (only applicable to solid tumors/lymphoma) |
| MBC site of metastasis | der_met_bone    | 0 = No; 1 = Yes; 99 = Unknown | Metastatic to bone                                                  |
| MBC site of metastasis | der_met_liver   | 0 = No; 1 = Yes; 99 = Unknown | Metastatic to liver                                                 |
| MBC site of metastasis | der_met_lung_v2 | 0 = No; 1 = Yes; 99 = Unknown | Metastatic to lung                                                  |

904

905

906 **APPENDIX D: Supplementary Figure I - Proportional Odds Assumption**

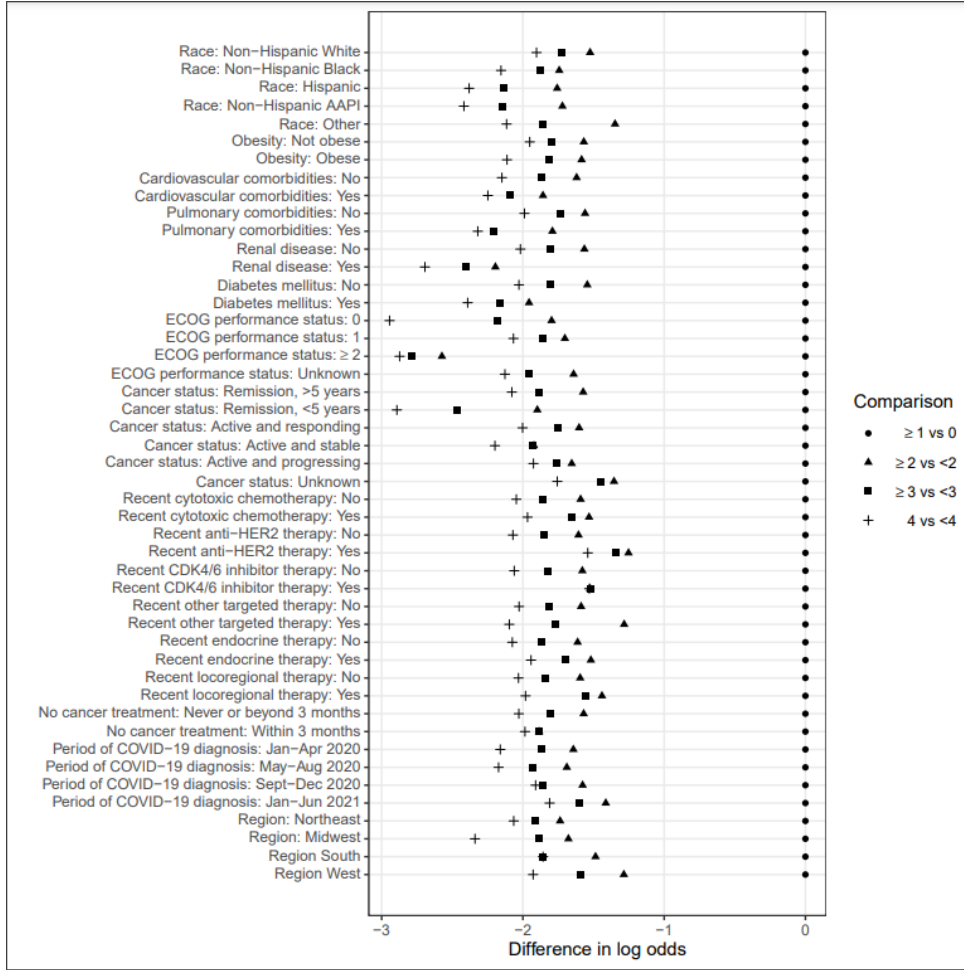

907  
908  
909  
910  
911  
912  
913  
914

915 **APPENDIX E**

| <b>Supplement Table 1. Unadjusted rates of outcomes after COVID-19 diagnosis by cancer status</b> |                           |                           |                                      |                                  |                                       |                             |                          |
|---------------------------------------------------------------------------------------------------|---------------------------|---------------------------|--------------------------------------|----------------------------------|---------------------------------------|-----------------------------|--------------------------|
|                                                                                                   | <b>NED&gt;5<br/>Years</b> | <b>NED&lt;5<br/>Years</b> | <b>Active<br/>and<br/>Responding</b> | <b>Active<br/>and<br/>Stable</b> | <b>Active<br/>and<br/>Progressing</b> | <b>Missing/<br/>Unknown</b> | <b>Total</b>             |
|                                                                                                   | <b>n<sup>a</sup> (%)</b>  | <b>n<sup>a</sup> (%)</b>  | <b>n<sup>a</sup> (%)</b>             | <b>n<sup>a</sup> (%)</b>         | <b>n<sup>a</sup> (%)</b>              | <b>n<sup>a</sup> (%)</b>    | <b>n<sup>a</sup> (%)</b> |
| <b>Outcomes</b>                                                                                   |                           |                           |                                      |                                  |                                       |                             |                          |
| Total all-cause mortality <sup>b</sup>                                                            | 40 (11)                   | 12 (3)                    | 12 (7)                               | 11 (7)                           | 37 (38)                               | 11 (9)                      | 123 (9)                  |
| 30-day all-cause mortality <sup>c</sup>                                                           | 29 (8)                    | 10 (2)                    | 10 (6)                               | 4 (2)                            | 27 (28)                               | 9 (7)                       | 89 (6)                   |
| Received mechanical ventilation <sup>b</sup>                                                      | 20 (5)                    | 13 (3)                    | 9 (5)                                | 7 (4)                            | 12 (12)                               | 8 (7)                       | 69 (5)                   |
| Admitted to an intensive care unit <sup>b</sup>                                                   | 35 (10)                   | 25 (6)                    | 13 (8)                               | 8 (5)                            | 18 (19)                               | 12 (10)                     | 111 (8)                  |
| Admitted to the hospital <sup>b</sup>                                                             | 163 (43)                  | 129 (29)                  | 54 (31)                              | 57 (34)                          | 70 (72)                               | 39 (32)                     | 512 (37)                 |
| <sup>a</sup> N is based on non-missing data                                                       |                           |                           |                                      |                                  |                                       |                             |                          |
| <sup>b</sup> Included in primary ordinal COVID-19 severity outcome.                               |                           |                           |                                      |                                  |                                       |                             |                          |
| <sup>c</sup> Secondary outcome.                                                                   |                           |                           |                                      |                                  |                                       |                             |                          |

916  
917  
918  
919  
920  
921  
922  
923  
924  
925  
926  
927  
928  
929  
930  
931  
932  
933  
934  
935

936 **APPENDIX F**

937

| <b>Supplementary Table IIA: Baseline characteristics of female patients with MBC</b> |                   |
|--------------------------------------------------------------------------------------|-------------------|
| <b>MBC<br/>(N=233)</b>                                                               |                   |
| <b>Age, years<sup>a</sup></b>                                                        |                   |
| Median [IQR]                                                                         | 58.0 [49.8, 68.3] |
| <b>Race/Ethnicity</b>                                                                |                   |
| Non-Hispanic White                                                                   | 107 (46%)         |
| Non-Hispanic Black                                                                   | 56 (24%)          |
| Hispanic                                                                             | 50 (21%)          |
| Non-Hispanic AAPI                                                                    | 10 (4%)           |
| Other                                                                                | 10 (4%)           |
| <b>Smoking Status</b>                                                                |                   |
| Never                                                                                | 162 (70%)         |
| Current or Former                                                                    | 66 (28%)          |
| Missing/unknown                                                                      | 5 (2%)            |
| <b>Obesity</b>                                                                       |                   |
| No                                                                                   | 139 (60%)         |
| Yes                                                                                  | 93 (40%)          |
| <b>Comorbidities<sup>b</sup></b>                                                     |                   |
| Cardiovascular                                                                       | 42 (18%)          |
| Pulmonary                                                                            | 37 (16%)          |
| Renal Disease                                                                        | 16 (7%)           |
| Diabetes mellitus                                                                    | 52 (22%)          |
| Missing/unknown                                                                      | 3 (1%)            |
| <b>ECOG Performance Status</b>                                                       |                   |
| 0                                                                                    | 63 (27%)          |
| 1                                                                                    | 84 (36%)          |
| 2+                                                                                   | 42 (18%)          |
| Unknown                                                                              | 44 (19%)          |
| Missing                                                                              | 0 (0%)            |
| <b>Receptor status</b>                                                               |                   |
| HR+/HER2-                                                                            | 98 (42%)          |
| HR+/HER2+                                                                            | 53 (23%)          |
| HR-/HER2+                                                                            | 26 (11%)          |
| Triple Negative                                                                      | 33 (14%)          |
| Missing/unknown                                                                      | 23 (10%)          |
| <b>Cancer Status</b>                                                                 |                   |

|                                                             |           |
|-------------------------------------------------------------|-----------|
| Active and responding                                       | 55 (24%)  |
| Active and stable                                           | 78 (33%)  |
| Active and progressing                                      | 74 (32%)  |
| Unknown                                                     | 25 (11%)  |
| Missing                                                     | 0 (0%)    |
| <b>Metastatic sites (MBC)</b>                               |           |
| Lung                                                        | 65 (28%)  |
| Bone                                                        | 135 (58%) |
| Liver                                                       | 61 (26%)  |
| Missing/unknown                                             | 19 (8%)   |
| <b>Timing of anti-cancer therapy</b>                        |           |
| Never/After COVID-19                                        | X*        |
| 0-4 weeks                                                   | 189 (81%) |
| 1-3 months                                                  | 14 (6%)   |
| >3 months                                                   | 19 (8%)   |
| Missing/unknown                                             | 11 (5%)*  |
| <b>Modality of active anti-cancer therapy<sup>b,c</sup></b> |           |
| None                                                        | 24 (10%)  |
| Cytotoxic Chemotherapy                                      | 114 (49%) |
| Targeted Therapy                                            | 115 (49%) |
| Endocrine Therapy                                           | 98 (42%)  |
| Immunotherapy                                               | 17 (7%)   |
| Local (Surgery/Radiation)                                   | 27 (12%)  |
| Other                                                       | 6 (3%)    |
| Missing/unknown                                             | 6 (3%)    |
| <b>Region</b>                                               |           |
| Northeast                                                   | 97 (42%)  |
| Midwest                                                     | 44 (19%)  |
| South                                                       | 34 (15%)  |
| West                                                        | 56 (24%)  |
| Undesignated                                                | 2 (1%)    |
| <b>Period of COVID-19 diagnosis</b>                         |           |
| Jan-Apr 2020                                                | 33 (14%)  |
| May-Aug 2020                                                | 101 (43%) |
| Sept-Dec 2020                                               | 52 (22%)  |
| Jan-Aug 2021                                                | 45 (19%)  |
| Missing/unknown                                             | 2 (1%)    |
| <b>Area of patient residence</b>                            |           |
| Urban                                                       | 103 (44%) |
| Suburban                                                    | 80 (34%)  |
| Rural                                                       | 12 (5%)   |
| Missing/unknown                                             | 38 (16%)  |
| <b>Treatment center characteristics</b>                     |           |

|                                                                                            |           |
|--------------------------------------------------------------------------------------------|-----------|
| Academic Medical Center                                                                    | 43 (18%)  |
| Community Practice                                                                         | 63 (27%)  |
| Tertiary Care Center                                                                       | 127 (55%) |
| Missing/unknown                                                                            | 0 (0%)    |
| <b>Severity of COVID19</b>                                                                 |           |
| Mild                                                                                       | 126 (54%) |
| Moderate                                                                                   | 93 (40%)  |
| Severe                                                                                     | 13 (6%)   |
| Missing/Unknown                                                                            | 1 (<1%)   |
| <b>*Cells combined to mask N&lt;5 according to CCC19 low count policy</b>                  |           |
| <sup>a</sup> Age was truncated at 90 years.                                                |           |
| <sup>b</sup> Percentages could sum to >100% because categories are not mutually exclusive. |           |
| <sup>c</sup> Within 3 months of COVID-19 diagnosis.                                        |           |

938

**Supplement Table IIB: Unadjusted rates of outcomes after COVID-19 diagnosis in females with MBC**

|                                                                                                                                                                                                                                                                                                                            | n <sup>f</sup> (%) |
|----------------------------------------------------------------------------------------------------------------------------------------------------------------------------------------------------------------------------------------------------------------------------------------------------------------------------|--------------------|
| <b>Outcomes</b>                                                                                                                                                                                                                                                                                                            |                    |
| Total all-cause mortality <sup>a</sup>                                                                                                                                                                                                                                                                                     | 45 (19)            |
| 30-day all-cause mortality <sup>b</sup>                                                                                                                                                                                                                                                                                    | 28 (12)            |
| Received mechanical ventilation <sup>a</sup>                                                                                                                                                                                                                                                                               | 20 (9)             |
| Admitted to an intensive care unit <sup>a</sup>                                                                                                                                                                                                                                                                            | 29 (12)            |
| Admitted to the hospital <sup>a</sup>                                                                                                                                                                                                                                                                                      | 124 (53)           |
| <b>Clinical Complications</b>                                                                                                                                                                                                                                                                                              |                    |
| Any cardiovascular complication <sup>c</sup>                                                                                                                                                                                                                                                                               | 48 (21)            |
| Any pulmonary complication <sup>d</sup>                                                                                                                                                                                                                                                                                    | 86 (37)            |
| Any gastrointestinal complication <sup>e</sup>                                                                                                                                                                                                                                                                             | 13 (6)             |
| Acute kidney injury                                                                                                                                                                                                                                                                                                        | 32 (14)            |
| Multisystem organ failure                                                                                                                                                                                                                                                                                                  | 12 (5)             |
| Superimposed infection                                                                                                                                                                                                                                                                                                     | 32 (14)            |
| Sepsis                                                                                                                                                                                                                                                                                                                     | 28 (12)            |
| Any bleeding                                                                                                                                                                                                                                                                                                               | 8 (3)              |
| <b>Interventions</b>                                                                                                                                                                                                                                                                                                       |                    |
| Remdesivir                                                                                                                                                                                                                                                                                                                 | 35 (15)            |
| Hydroxychloroquine                                                                                                                                                                                                                                                                                                         | 25 (11)            |
| Corticosteroids                                                                                                                                                                                                                                                                                                            | 65 (29)            |
| Covid Other                                                                                                                                                                                                                                                                                                                | 45 (20)            |
| Supplemental oxygen                                                                                                                                                                                                                                                                                                        | 84 (37)            |
| <sup>a</sup> Included in primary ordinal COVID-19 severity outcome                                                                                                                                                                                                                                                         |                    |
| <sup>b</sup> Secondary outcome                                                                                                                                                                                                                                                                                             |                    |
| <sup>c</sup> Cardiovascular complication includes hypotension, myocardial infarction, other cardiac ischemia, atrial fibrillation, ventricular fibrillation, other cardiac arrhythmia, cardiomyopathy, congestive heart failure, pulmonary embolism (PE), deep vein thrombosis (DVT), stroke, thrombosis NOS complication. |                    |
| <sup>d</sup> Pulmonary complication includes respiratory failure, pneumonitis, pneumonia, acute respiratory distress syndrome (ARDS), PE, pleural effusion, empyema.                                                                                                                                                       |                    |
| <sup>e</sup> Gastrointestinal complication includes acute hepatic injury, ascites, bowel obstruction, bowel perforation, ileus, peritonitis                                                                                                                                                                                |                    |
| <sup>f</sup> N is based on non-missing data                                                                                                                                                                                                                                                                                |                    |

939  
940  
941  
942  
943  
944  
945  
946

**APPENDIX G**



| <b>Supplement Table III: Adjusted Associations of Race Factors with COVID-19 Severity Outcome.</b> |                   |                                      |                                   |
|----------------------------------------------------------------------------------------------------|-------------------|--------------------------------------|-----------------------------------|
| <b>Race (Ref: NHW)</b>                                                                             | COVID-19 severity |                                      |                                   |
|                                                                                                    | OR (95% CI)       | Point Value E estimates <sup>a</sup> | Lower bound E values <sup>a</sup> |
| Black                                                                                              | 1.74 (1.24- 2.45) | 1.97                                 | 1.47                              |
| Hispanic                                                                                           | 1.38 (0.93- 2.05) | 1.63                                 | 1.00                              |
| AAPI                                                                                               | 3.40 (1.70- 6.79) | 3.09                                 | 1.93                              |
| Other                                                                                              | 2.97 (1.71- 5.17) | 2.84                                 | 1.94                              |

<sup>a</sup>These values were calculated based on the formula for logistic regression

947  
948  
949  
950  
951  
952  
953  
954  
955  
956  
957  
958  
959  
960  
961  
962  
963  
964  
965  
966  
967  
968  
969 **APPENDIX H:**

| <b>Supplement Table IVA: Male patients with breast cancer and COVID-19: Baseline Characteristics</b> |                  |
|------------------------------------------------------------------------------------------------------|------------------|
| <b>Total</b>                                                                                         | <b>25 (100%)</b> |
| <b>Age, years<sup>a</sup></b>                                                                        |                  |
| Median [IQR]                                                                                         | 67.0 [60 - 75]   |
| <b>Race/Ethnicity</b>                                                                                |                  |
| NHW                                                                                                  | 13 (52%)         |
| Black                                                                                                | 8 (32%)          |
| Hispanic                                                                                             | <5 (<20%)        |
| AAPI                                                                                                 | 0 (0%)           |
| Other                                                                                                | <5 (<20%)        |
| <b>Smoking Status</b>                                                                                |                  |
| Never                                                                                                | 18 (72%)         |
| Current or Former                                                                                    | 7 (28%)          |
| <b>Obesity</b>                                                                                       |                  |
| No                                                                                                   | 12 (48%)         |
| Yes                                                                                                  | 13 (52%)         |
| <b>Comorbidities<sup>b</sup></b>                                                                     |                  |
| Cardiovascular                                                                                       | 6 (24%)          |
| Pulmonary                                                                                            | 5 (20%)          |
| Renal Disease                                                                                        | <5 (<20%)        |
| Diabetes mellitus                                                                                    | 11 (44%)         |
| <b>ECOG Performance Status</b>                                                                       |                  |
| 0                                                                                                    | 5 (20%)          |
| 1                                                                                                    | 10 (40%)         |
| 2+                                                                                                   | X*               |
| Unknown                                                                                              | 10 (40%)*        |
| <b>Receptor status</b>                                                                               |                  |
| HR+/HER2-                                                                                            | 18 (72%)         |
| HR+/HER2+                                                                                            | 5 (20%)          |
| HR+/HER2+                                                                                            | X*               |
| Triple Negative                                                                                      | 0 (0%)           |
| Missing/unknown                                                                                      | 2 (8%)*          |
| <b>Cancer Status</b>                                                                                 |                  |
| Remission or NED, >5 years                                                                           | <5 (<20%)        |
| Remission or NED, <5 years                                                                           | 6 (24%)          |
| Active and responding                                                                                | <5 (<20%)        |
| Active and stable                                                                                    | <5 (<20%)        |
| Active and progressing                                                                               | 5 (20%)          |

|                                                                                                         |           |
|---------------------------------------------------------------------------------------------------------|-----------|
| Unknown                                                                                                 | 3 (12%)   |
| <b>Timing of anti-cancer therapy</b>                                                                    |           |
| Never/After COVID-19                                                                                    | <5 (<20%) |
| 0-4 weeks                                                                                               | 17 (68%)  |
| 1-3 months                                                                                              | 0 (0%)    |
| >3 months                                                                                               | <5 (<20%) |
| Missing/unknown                                                                                         | 1 (4%)    |
| <b>Modality of active anti-cancer therapy<sup>b,c</sup></b>                                             |           |
| None                                                                                                    | 7 (28%)   |
| Chemotherapy                                                                                            | 6 (24%)   |
| Targeted Therapy                                                                                        | 6 (24%)   |
| Endocrine Therapy                                                                                       | 10 (40%)  |
| Immunotherapy                                                                                           | 0 (0%)    |
| Local (Surgery/Radiation)                                                                               | <5 (<20%) |
| Other                                                                                                   | 0 (0%)    |
| Missing/unknown                                                                                         | 1 (4%)    |
| <b>Region</b>                                                                                           |           |
| Northeast                                                                                               | 11 (44%)  |
| Midwest                                                                                                 | <5 (<20%) |
| South                                                                                                   | <5 (<20%) |
| West                                                                                                    | 7 (28%)   |
| Undesignated                                                                                            | 0 (0%)    |
| <b>Period of COVID-19 diagnosis</b>                                                                     |           |
| Jan-Apr 2020                                                                                            | 10 (40%)  |
| May-Aug 2020                                                                                            | 9 (36%)   |
| Sept-Dec 2020                                                                                           | 5 (20%)   |
| <b>Area of patient residence</b>                                                                        |           |
| Urban                                                                                                   | 9 (36%)   |
| Suburban                                                                                                | 8 (32%)   |
| Rural                                                                                                   | 0 (0%)    |
| Missing/unknown                                                                                         | 8 (32%)   |
| <b>Severity of COVID19</b>                                                                              |           |
| Mild                                                                                                    | 11 (44%)  |
| Moderate/Severe                                                                                         | 14 (56%)  |
| <b>*Cells combined to mask N&lt;5 according to CCC19 low count policy</b>                               |           |
| <sup>a</sup> Age was truncated at 90 years.                                                             |           |
| <sup>b</sup> Percentages could sum to >100% because categories are not mutually exclusive.              |           |
| <sup>c</sup> Within 3 months of COVID-19 diagnosis.                                                     |           |
| Variable Categories with one to five cases are masked by replacing with N < 5 according to CCC19 policy |           |

| <b>Suppl Table IVB: Unadjusted rates of outcomes after COVID-19 diagnosis<br/>among males with BC</b>                                                                                                                                                                                                                      |           |
|----------------------------------------------------------------------------------------------------------------------------------------------------------------------------------------------------------------------------------------------------------------------------------------------------------------------------|-----------|
| <b>Outcomes</b>                                                                                                                                                                                                                                                                                                            |           |
| Total all-cause mortality                                                                                                                                                                                                                                                                                                  | 5 (20)    |
| 30-day all-cause mortality                                                                                                                                                                                                                                                                                                 | 5 (20)    |
| Received mechanical ventilation                                                                                                                                                                                                                                                                                            | <5 (<20%) |
| Admitted to an intensive care unit                                                                                                                                                                                                                                                                                         | <5 (<20%) |
| Admitted to the hospital                                                                                                                                                                                                                                                                                                   | 15 (60)   |
| <b>Clinical Complications</b>                                                                                                                                                                                                                                                                                              |           |
| Any cardiovascular complication <sup>a</sup>                                                                                                                                                                                                                                                                               | <5 (<20%) |
| Any pulmonary complication <sup>b</sup>                                                                                                                                                                                                                                                                                    | 12 (48)   |
| Any gastrointestinal complication <sup>c</sup>                                                                                                                                                                                                                                                                             | 0 (0%)    |
| Acute kidney injury                                                                                                                                                                                                                                                                                                        | <5 (<20%) |
| Multisystem organ failure                                                                                                                                                                                                                                                                                                  | <5 (<20%) |
| Superimposed infection                                                                                                                                                                                                                                                                                                     | <5 (<20%) |
| Sepsis                                                                                                                                                                                                                                                                                                                     | <5 (<20%) |
| Any bleeding                                                                                                                                                                                                                                                                                                               | <5 (<20%) |
| <b>Interventions</b>                                                                                                                                                                                                                                                                                                       |           |
| Remdesivir                                                                                                                                                                                                                                                                                                                 | <5 (<20%) |
| Hydroxychloroquine                                                                                                                                                                                                                                                                                                         | 7 (28)    |
| Corticosteroids                                                                                                                                                                                                                                                                                                            | <5 (<20%) |
| Other                                                                                                                                                                                                                                                                                                                      | 9 (36)    |
| Supplemental oxygen                                                                                                                                                                                                                                                                                                        | 12 (48)   |
| Variable Categories with one to five cases are masked by replacing with N < 5 according to CCC19 policy                                                                                                                                                                                                                    |           |
| <sup>a</sup> Cardiovascular complication includes hypotension, myocardial infarction, other cardiac ischemia, atrial fibrillation, ventricular fibrillation, other cardiac arrhythmia, cardiomyopathy, congestive heart failure, pulmonary embolism (PE), deep vein thrombosis (DVT), stroke, thrombosis NOS complication. |           |
| <sup>b</sup> Pulmonary complication includes respiratory failure, pneumonitis, pneumonia, acute respiratory distress syndrome (ARDS), PE, pleural effusion, empyema.                                                                                                                                                       |           |
| <sup>c</sup> Gastrointestinal complication includes acute hepatic injury, ascites, bowel obstruction, bowel perforation, ileus, peritonitis                                                                                                                                                                                |           |

972 **APPENDIX I:**

973 **List of Participants by Institution**

974 Alphabetical list of participants by institution that contributed at least one record to the analysis.

975 **Bolded** = site PI/co-PIs; site co-investigators are listed alphabetically by last name.

- 976 • **Balazs Halmos, MD; Amit Verma, MBBS**; Benjamin A. Gartrell, MD; Sanjay Goel, MBBS; Nitin Ohri, MD; R.  
977 Alejandro Sica, MD; Astha Thakkar, MD (Albert Einstein College of Medicine, Montefiore Medical Center, Bronx,  
978 NY, USA)
- 979 • **Keith E. Stockerl-Goldstein, MD**; Omar Butt, MD, PhD; Jian Li Campian, MD, PhD; Mark A. Fiala, MSW;  
980 Jeffrey P. Henderson, MD, PhD; Ryan S. Monahan, MBA; Alice Y. Zhou, MD, PhD (Alvin J. Siteman Cancer  
981 Center at Washington University School of Medicine and Barnes-Jewish Hospital, St. Louis, MO, USA)
- 982 • **Michael A. Thompson, MD, PhD, FASCO**; Pamela Bohachek, RN, CCRC; Daniel Mundt, MD; Mitrianna  
983 Streckfuss, MPH; Eyob Tadesse, MD (Aurora Cancer Care, Advocate Aurora Health, Milwaukee, WI, USA)
- 984 • **Philip E. Lammers, MD, MSCI** (Baptist Cancer Center, Memphis, TN, USA)
- 985 • **Sanjay G. Revankar, MD, FIDSA** (The Barbara Ann Karmanos Cancer Institute at Wayne State University School  
986 of Medicine, Detroit, MI, USA)
- 987 • **Jaymin M. Patel, MD**; Andrew J. Piper-Vallillo, MD; Poorva Bindal, MBBS (Beth Israel Deaconess Medical  
988 Center, Boston, MA, USA)
- 989 • **Orestis A. Panagiotou, MD, PhD**; Pamela C. Egan, MD; Dimitrios Farmakiotis, MD, FACP, FIDSA; Hina Khan,  
990 MD; Adam J. Olszewski, MD (Brown University and Lifespan Cancer Institute, Providence, RI, USA)
- 991 • **Arturo Loaiza-Bonilla, MD, MSED, FACP** (Cancer Treatment Centers of America, AZ/GA/IL/OK/PA, USA)
- 992 • **Salvatore A. Del Prete, MD**; Michael H. Bar, MD, FACP; Anthony P. Gulati, MD; K. M. Steve Lo, MD; Suzanne  
993 J. Rose, MS, PhD, CCRC, FACRP; Jamie Stratton, MD; Paul L. Weinstein, MD (Carl & Dorothy Bennett Cancer  
994 Center at Stamford Hospital, Stamford, CT, USA)
- 995 • **Robin A. Buerki, MD**; Jorge A. Garcia, MD, FACP (Case Comprehensive Cancer Center at Case Western Reserve  
996 University/University Hospitals, Cleveland, OH, USA)
- 997 • **Shilpa Gupta, MD**; Nathan A. Pennell, MD, PhD, FASCO; Manmeet S. Ahluwalia, MD, FACP; Scott J. Dawsey,  
998 MD; Christopher A. Lemmon, MD; Amanda Nizam, MD (Cleveland Clinic, Cleveland, OH, USA)
- 999 • **Claire Hoppenot, MD; Ang Li, MD, MS** (Dan L Duncan Comprehensive Cancer Center at Baylor College of  
1000 Medicine, Houston, TX, USA)
- 1001 • **Toni K. Choueiri, MD**; Ziad Bakouny, MD, MSc; Jean M. Connors, MD; George D. Demetri, MD, FASCO; Dory  
1002 A. Freeman, BS; Antonio Giordano, MD, PhD; Chris Labaki, MD; Alicia K. Morgans, MD, MPH; Anju Nohria,  
1003 MD; Andrew L. Schmidt, MD; Eliezer M. Van Allen, MD; Pier Vitale Nuzzo, MD, PhD; Wenxin (Vincent) Xu,  
1004 MD; Rebecca L. Zon, MD (Dana-Farber Cancer Institute, Boston, MA, USA) (Dana-Farber Cancer Institute,  
1005 Boston, MA, USA)
- 1006 • **Susan Halabi, PhD, FASCO**; Tian Zhang, MD, MHS (Duke Cancer Institute at Duke University Medical Center,  
1007 Durham, NC, USA)
- 1008 • **John C. Leighton Jr, MD, FACP** (Einstein Healthcare Network, Philadelphia, PA, USA)
- 1009 • **Gary H. Lyman, MD, MPH, FASCO, FRCP**; Jerome J. Graber MD, MPH; Petros Grivas, MD, PhD; Elizabeth T.  
1010 Loggers, MD, PhD; Ryan C. Lynch, MD; Elizabeth S. Nakasone, MD, PhD; Michael T. Schweizer, MD; Lisa  
1011 Tachiki, MD; Shaveta Vinayak, MD, MS; Michael J. Wagner, MD; Albert Yeh, MD (Fred Hutchinson Cancer  
1012 Research Center/University of Washington/Seattle Cancer Care Alliance, Seattle, WA, USA)
- 1013 • **Sharad Goyal, MD; Minh-Phuong Huynh-Le, MD, MAS** (George Washington University, Washington, DC,  
1014 USA)
- 1015 • **Lori J. Rosenstein, MD** (Gundersen Health System, WI, USA)
- 1016 • **Peter Paul Yu, MD, FACP, FASCO**; Jessica M. Clement, MD; Ahmad Daher, MD; Mark E. Dailey, MD; Rawad  
1017 Elias, MD; Asha Jayaraj, MD; Emily Hsu, MD; Alvaro G. Menendez, MD; Oscar K. Serrano, MD, MBA, FACS  
1018 (Hartford HealthCare Cancer Institute, Hartford, CT, USA)
- 1019 • **Clara Hwang, MD**; Shirish M. Gadgeel, MD; Sunny R K Singh, MD (Henry Ford Cancer Institute, Henry Ford  
1020 Hospital, Detroit, MI, USA)

- 1021 • **Melissa K. Accordino, MD, MS**; Divaya Bhutani, MD; Jessica E. Hawley, MD; Dawn Hershman, MD, MS,  
1022 FASCO; Gary K. Schwartz, MD (Herbert Irving Comprehensive Cancer Center at Columbia University, New York,  
1023 NY, USA)
- 1024 • **Daniel Y. Reuben, MD, MS**; Mariam Alexander, MD, PhD; Sara Matar, MD; Sarah Mushtaq, MD (Hollings  
1025 Cancer Center at the Medical University of South Carolina, Charleston, SC, USA)
- 1026 • **Eric H. Bernicker, MD** (Houston Methodist Cancer Center, Houston, TX, USA)
- 1027 • **John F. Deeken, MD**; Danielle Shafer, DO (Inova Schar Cancer Institute, Fairfax, VA, USA)
- 1028 • **Mark A. Lewis, MD; Terence D. Rhodes, MD, PhD**; David M. Gill, MD; Clarke A. Low, MD (Intermountain  
1029 Health Care, Salt Lake City, UT, USA)
- 1030 • **Sandeep H. Mashru, MD**; Abdul-Hai Mansoor, MD (Kaiser Permanente Northwest, OR/WA, USA)
- 1031 • **Brandon Hayes-Lattin, MD, FACP**; Aaron M. Cohen, MD, MS; Shannon McWeeney, PhD; Encida R. Nemecek,  
1032 MD, MS, MBA; Staci P. Williamson, BS (Knight Cancer Institute at Oregon Health and Science University,  
1033 Portland, OR, USA)
- 1034 • **Howard A. Zaren, MD, FACS**; Stephanie J. Smith, RN, MSN, OCN (Lewis Cancer & Research Pavilion @ St.  
1035 Joseph's/Candler, Savannah, GA, USA)
- 1036 • **Gayathri Nagaraj, MD**; Mojtaba Akhtari, MD; Eric Lau, DO; Mark E. Reeves, MD, PhD (Loma Linda University  
1037 Cancer Center, Loma Linda, CA, USA)
- 1038 • **Stephanie Berg, DO**; Natalie Knox (Loyola University Medical Center, Maywood, IL, USA)
- 1039 • **Firas H. Wehbe, MD, PhD**; Jessica Altman, MD; Michael Gurley, BA; Mary F. Mulcahy, MD (Lurie Cancer  
1040 Center at Northwestern University, Chicago, IL, USA)
- 1041 • **Eric B. Durbin, DrPH, MS** (Markey Cancer Center at the University of Kentucky, Lexington, KY, USA)
- 1042 • **Amit A. Kulkarni, MD**; Heather H. Nelson, PhD, MPH; Zohar Sachs, MD, PhD (Masonic Cancer Center at the  
1043 University of Minnesota, Minneapolis, MN, USA)
- 1044 • **Rachel P. Rosovsky, MD, MPH; Kerry L. Reynolds, MD**; Aditya Bardia, MD; Genevieve Boland, MD, PhD,  
1045 FACS; Justin F. Gainor, MD; Leyre Zubiri, MD, PhD (Massachusetts General Hospital Cancer Center, Boston, MA,  
1046 USA)
- 1047 • **Thorvardur R. Halfdanarson, MD**; Tanios S. Bekaii-Saab, MD, FACP; Aakash Desai, MD, MPH; Surbhi Shah,  
1048 MD; Zhuoer Xie, MD, MS (Mayo Clinic, AZ/FL/MN, USA) (Mayo Clinic, AZ/FL/MN, USA)
- 1049 • **Ruben A. Mesa, MD, FACP**; Mark Bonnen, MD; Daruka Mahadevan, MD, PhD; Amelie G. Ramirez, DrPH,  
1050 MPH; Mary Salazar, DNP, MSN, RN, ANP-BC; Dimpy P. Shah, MD, PhD; Pankil K. Shah, MD, MSPH (Mays  
1051 Cancer Center at UT Health San Antonio MD Anderson Cancer Center, San Antonio, TX, USA)
- 1052 • **Gregory J. Riely, MD, PhD; Elizabeth V. Robilotti MD, MPH**; Rimma Belenkaya, MA, MS; John Philip, MS  
1053 (Memorial Sloan Kettering Cancer Center, New York, NY, USA)
- 1054 • **Bryan Faller, MD** (Missouri Baptist Medical Center, St. Louis, MO, USA)
- 1055 • **Rana R. McKay, MD**; Archana Ajmera, MSN, ANP-BC, AOCNP; Sharon S. Brouha, MD, MPH; Angelo Cabal,  
1056 BS; Sharon Choi, MD, PhD; Albert Hsiao, MD, PhD; Jun Yang Jiang, MD; Seth Kligerman, MD; Taylor K.  
1057 Nonato; Erin G. Reid, MD (Moores Comprehensive Cancer Center at the University of California, San Diego, La  
1058 Jolla, CA, USA)
- 1059 • **Lisa B. Weissmann, MD**; Chinmay Jani, MD; Carey C. Thomson, MD, FCCP, MPH (Mount Auburn Hospital,  
1060 Cambridge, MA, USA)
- 1061 • **Jeanna Knoble, MD**; Mary Grace Glace, RN; Cameron Rink, PhD, MBA; Karen Stauffer, RN; Rosemary Zacks,  
1062 RN (Mount Carmel Health System, Columbus, OH, USA)
- 1063 • **Sibel Blau, MD** (Northwest Medical Specialties, Tacoma, WA, USA)
- 1064 • **Daniel G. Stover, MD**; Daniel Addison, MD; James L. Chen, MD; Margaret E. Gatti-Mays, MD; Sachin R. Jhavar,  
1065 MD; Vidhya Karivedu, MBBS; Joshua D. Palmer, MD; Sarah Wall, MD; Nicole O. Williams, MD (The Ohio State  
1066 University Comprehensive Cancer Center, Columbus, OH, USA)
- 1067 • **Monika Joshi, MD, MRCP**; Hyma V. Polimera, MD; Lauren D. Pomerantz; Marc A. Rovito, MD, FACP (Penn  
1068 State Health/Penn State Cancer Institute/St. Joseph Cancer Center, PA, USA)
- 1069 • **Elizabeth A. Griffiths, MD**; Amro Elshoury, MBBCh (Roswell Park Comprehensive Cancer Center, Buffalo, NY,  
1070 USA)
- 1071 • **Salma K. Jabbour, MD**; Christian F. Misdary, MD; Mansi R. Shah, MD (Rutgers Cancer Institute of New Jersey at  
1072 Rutgers Biomedical and Health Sciences, New Brunswick, NJ, USA)
- 1073 • **Babar Bashir, MD, MS**; Christopher McNair, PhD; Sana Z. Mahmood, BA, BS; Vasil Mico, BS; Andrea Verghese  
1074 Rivera, MD (Sidney Kimmel Cancer Center at Thomas Jefferson University, Philadelphia, PA, USA)

- 1075 • **Sumit A. Shah, MD, MPH**; Elwyn C. Cabebe, MD; Michael J. Glover, MD; Alok Kumar Jha, PhD; Ali Raza Khaki,  
1076 MD; Lidia Schapira, MD, FASCO; Julie Tsu-Yu Wu, MD, PhD (Stanford Cancer Institute at Stanford University,  
1077 Palo Alto, CA, USA)
- 1078 • **Suki Subbiah, MD** (Stanley S. Scott Cancer Center at LSU Health Sciences Center, New Orleans, LA, USA)
- 1079 • **Daniel B. Flora, MD, PharmD**; Goetz Kloecker, MD; Barbara B. Logan, MS; Chaitanya Mandapakala, MD (St.  
1080 Elizabeth Healthcare, Edgewood, KY, USA)
- 1081 • **Gilberto de Lima Lopes Jr., MD, MBA, FAMS, FASCO** (Sylvester Comprehensive Cancer Center at the  
1082 University of Miami Miller School of Medicine, Miami, FL, USA)
- 1083 • **Karen Russell, MD, FACP**; Brittany Stith, RN, BSN, OCN, CCRP (Tallahassee Memorial Healthcare, Tallahassee,  
1084 FL, USA)
- 1085 • **Natasha C. Edwin, MD**; Melissa Smits, APC (ThedaCare Cancer Care, Appleton, WI, USA)
- 1086 • **David D. Chism, MD**; Susie Owenby, RN, CCRP (Thompson Cancer Survival Center, Knoxville, TN, USA)
- 1087 • **Deborah B. Doroshow, MD, PhD**; Matthew D. Galsky, MD; Michael Wotman, MD (Tisch Cancer Institute at the  
1088 Icahn School of Medicine at Mount Sinai, New York, NY, USA)
- 1089 • **Julie C. Fu, MD**; Alyson Fazio, APRN-BC; Kathryn E. Huber, MD; Mark H. Sueyoshi, MD (Tufts Medical Center  
1090 Cancer Center, Boston and Stoneham, MA, USA)
- 1091 • **Jonathan Riess, MD, MS**; Kanishka G. Patel, MD (UC Davis Comprehensive Cancer Center at the University of  
1092 California at Davis, CA, USA)
- 1093 • **Vadim S. Koshkin, MD**; Hala T. Borno, MD; Daniel H. Kwon, MD; Eric J. Small, MD; Sylvia Zhang, MS (UCSF  
1094 Helen Diller Family Comprehensive Cancer Center at the University of California at San Francisco, CA, USA)
- 1095 • **Samuel M. Rubinstein, MD; William A. Wood, MD, MPH**; Christopher Jensen, MD (UNC Lineberger  
1096 Comprehensive Cancer Center, Chapel Hill, NC, USA)
- 1097 • **Trisha M. Wise-Draper, MD, PhD**; Syed A. Ahmad, MD, FACS; Punita Grover, MD; Shuchi Gulati, MD; Jordan  
1098 Kharofa, MD; Tahir Latif, MBBS, MBA; Michelle Marcum, MS; Hira G. Shaikh, MD (University of Cincinnati  
1099 Cancer Center, Cincinnati, OH, USA)
- 1100 • **Daniel W. Bowles, MD**; Christopher L. Geiger, MD (University of Colorado Cancer Center, Aurora, CO, USA)
- 1101 • **Merry-Jennifer Markham, MD, FACP, FASCO**; Atlantis D. Russ, MD, PhD; Haneen Saker, MD (University of  
1102 Florida Health Cancer Center, Gainesville, FL, USA)
- 1103 • **Jared D. Acoba, MD**; Young Soo Rho, MD, CM (University of Hawai'i Cancer Center, Honolulu, HI, USA)
- 1104 • **Lawrence E. Feldman, MD; Kent F. Hoskins, MD**; Gerald Gantt Jr., MD; Li C. Liu, PhD; Mahir Khan, MD;  
1105 Ryan H. Nguyen, DO; Mary Pasquinelli, APN, DNP; Candice Schwartz, MD; Neeta K. Venepalli, MD, MBA  
1106 (University of Illinois Hospital & Health Sciences System, Chicago, IL, USA)
- 1107 • **Praveen Vikas, MD** (University of Iowa Holden Comprehensive Cancer Center, Iowa City, IA, USA)
- 1108 • **Elizabeth Wulff-Burchfield, MD**; Anup Kasi MD, MPH (The University of Kansas Cancer Center, Kansas City,  
1109 KS, USA)
- 1110 • **Christopher R. Friese, PhD, RN, AOCN, FAAN; Leslie A. Fecher, MD** (University of Michigan Rogel Cancer  
1111 Center, Ann Arbor, MI, USA)
- 1112 • **Blanche H. Mavromatis, MD**; Ragneel R. Bijjula, MD; Qamar U. Zaman, MD (UPMC Western Maryland,  
1113 Cumberland, MD, USA)
- 1114 • **Jeremy L. Warner, MD, MS, FAMIA, FASCO**; Alaina J. Brown, MD, MPH; Alicia Beeghly-Fadiel, PhD; Alex  
1115 Cheng, PhD; Sarah Croessmann, PhD; Elizabeth J. Davis, MD; Stephany N. Duda, PhD, MS; Kyle T. Enriquez,  
1116 MSc BS; Benjamin French, PhD; Erin A. Gillaspie, MD, MPH; Daniel Hausrath, MD; Cassandra Hennessy, MS;  
1117 Chih-Yuan Hsu, PhD; Douglas B. Johnson, MD, MSCI; Xuanyi Li, BA; Sanjay Mishra, MS, PhD; Sonya A. Reid,  
1118 MD, MPH; Brian I. Rini, MD, FACP, FASCO; Yu Shyr, PhD; David A. Slosky, MD; Carmen C. Solorzano, MD,  
1119 FACS; Tianyi Sun, MS; Matthew D. Tucker, MD; Karen Vega-Luna, MA; Lucy L. Wang, BA (Vanderbilt-Ingram  
1120 Cancer Center at Vanderbilt University Medical Center, Nashville, TN, USA)
- 1121 • **David M. Aboulafia, MD**; Brett A. Schroeder, MD (Virginia Mason Cancer Institute, Seattle, WA, USA)
- 1122 • **Matthew Puc, MD**; Theresa M. Carducci, MSN, RN, CCRP; Karen J. Goldsmith, BSN, RN; Susan Van Loon, RN,  
1123 CTR, CCRP (Virtua Health, Marlton, NJ, USA)
- 1124 • **Umit Topaloglu, PhD, FAMIA**; Saif I. Alimohamed, MD (Wake Forest Baptist Comprehensive Cancer Center,  
1125 Winston-Salem, NC, USA)
- 1126 • **Robert L. Rice, MD, PhD** (WellSpan Health, York, PA, USA)
- 1127 • **Prakash Peddi, MD; Lane R. Rosen, MD**; Briana Barrow McCollough, BSc, CCRP (Willis-Knighton Cancer  
1128 Center, Shreveport, LA, USA)

- 1129
- 1130
- 1131
- 1132
- 1133
- 1134
- **Mehmet A. Bilen, MD**; Cecilia A. Castellano; Deepak Ravindranathan, MD, MS (Winship Cancer Institute of Emory University, Atlanta, GA, USA)
  - **Navid Hafez, MD, MPH**; Roy Herbst, MD, PhD; Patricia LoRusso, DO, PhD; Maryam B. Lustberg, MD, MPH; Tyler Masters, MS; Catherine Stratton, BA (Yale Cancer Center at Yale University School of Medicine, New Haven, CT, USA) (Yale Cancer Center at Yale University School of Medicine, New Haven, CT, USA)
